# Supplementary material for: Binding between ROCK1 and DCTN2 triggers diabetes-associated centrosome amplification in colon cancer cells
Source: PubMed Central journal article supplement — Oncol Rep. 2021 Jun 2;46(1):151. doi: 10.3892/or.2021.8102 (PMC8185503; doi:10.3892/or.2021.8102), 2021-06-02
Supplement: Supplementary_Data.pdf [file Supplementary_Data.pdf]

Table SI.

## A, Proteins identified exclusively from the control group

| Protein ID             | Protein names                                                                                                                                                                                                                        | Gene names       | Score  | LFQ intensity C |
|------------------------|--------------------------------------------------------------------------------------------------------------------------------------------------------------------------------------------------------------------------------------|------------------|--------|-----------------|
| Q8WWQ0, Q9NSI6         | PH-interacting protein                                                                                                                                                                                                               | PHIP             | 156.65 | 2179600000      |
| P11388                 | DNA topoisomerase 2-alpha                                                                                                                                                                                                            | TOP2A            | 118.62 | 1924500000      |
| Q9Y2W1                 | Thyroid hormone receptor-associated protein 3                                                                                                                                                                                        | THRAP3           | 115.1  | 7020100000      |
| Q9NYF8                 | Bcl-2-associated transcription factor 1                                                                                                                                                                                              | BCLAF1           | 102.19 | 4169100000      |
| Q99986                 | Serine/threonine-protein kinase VRK1                                                                                                                                                                                                 | VRK1             | 77.36  | 1866300000      |
| Q8WWM7                 | Ataxin-2-like protein                                                                                                                                                                                                                | ATXN2L           | 73.128 | 1447600000      |
| Q16629                 | Serine/arginine-rich splicing factor 7                                                                                                                                                                                               | SRSF7            | 70.114 | 6352700000      |
| O00422                 | Histone deacetylase complex subunit SAP18                                                                                                                                                                                            | SAP18            | 63.479 | 1910600000      |
| Q6PL18, Q9ULI0         | ATPase family AAA domain-containing protein 2                                                                                                                                                                                        | ATAD2            | 60.778 | 619150000       |
| Q9H307                 | Pinin                                                                                                                                                                                                                                | PNN              | 60.763 | 2959400000      |
| P51149                 | Ras-related protein Rab-7a                                                                                                                                                                                                           | RAB7A            | 58.553 | 590460000       |
| P62263                 | 40S ribosomal protein S14                                                                                                                                                                                                            | RPS14            | 58.219 | 1198600000      |
| Q13619                 | Cullin-4A                                                                                                                                                                                                                            | CUL4A            | 58.188 | 495460000       |
| Q7Z7K6                 | Centromere protein V                                                                                                                                                                                                                 | CENPV            | 55.289 | 1611800000      |
| Q15287                 | RNA-binding protein with serine-rich domain 1                                                                                                                                                                                        | RNPS1            | 50.473 | 1370500000      |
| Q14669                 | E3 ubiquitin-protein ligase TRIP12                                                                                                                                                                                                   | TRIP12           | 48.589 | 220640000       |
| Q13242                 | Serine/arginine-rich splicing factor 9                                                                                                                                                                                               | SRSF9            | 44.497 | 2561600000      |
| P61326, Q96A72         | Protein mago nashi homolog; Protein mago nashi homolog 2                                                                                                                                                                             | MAGOH;<br>MAGOHB | 40.76  | 1544600000      |
| P46100                 | Transcriptional regulator ATRX                                                                                                                                                                                                       | ATRX             | 37.771 | 233950000       |
| Q9UIG0                 | Tyrosine-protein kinase BAZ1B                                                                                                                                                                                                        | BAZ1B            | 36.177 | 341930000       |
| Q13595                 | Transformer-2 protein homolog alpha                                                                                                                                                                                                  | TRA2A            | 30.223 | 449990000       |
| Q9NUJ1                 | Mycophenolic acid acyl-glucuronide esterase, mitochondrial                                                                                                                                                                           | ABHD10           | 30.177 | 277540000       |
| P51114, P51116, Q06787 | Fragile X mental retardation syndrome-related protein 1; Fragile X mental retardation syndrome-related protein 2                                                                                                                     | FXR1;<br>FXR2    | 30.023 | 278210000       |
| Q53HL2                 | Borealin                                                                                                                                                                                                                             | CDCA8            | 28.556 | 328590000       |
| O43809                 | Cleavage and polyadenylation specificity factor subunit 5                                                                                                                                                                            | NUDT21           | 28.08  | 297170000       |
| Q9BY77                 | Polymerase delta-interacting protein 3                                                                                                                                                                                               | POLDIP3          | 23.351 | 449530000       |
| P11586                 | C-1-tetrahydrofolate synthase, cytoplasmic; Methylenetetrahydrofolate dehydrogenase; Methylenetetrahydrofolate cyclohydrolase; Formyltetrahydrofolate synthetase; C-1-tetrahydrofolate synthase, cytoplasmic, N-terminally processed | MTHFD1           | 23.249 | 291230000       |
| P23588                 | Eukaryotic translation initiation factor 4B                                                                                                                                                                                          | EIF4B            | 22.53  | 290530000       |
| Q9NQS7                 | Inner centromere protein                                                                                                                                                                                                             | INCENP           | 21.428 | 130700000       |
| O75494                 | Serine/arginine-rich splicing factor 10                                                                                                                                                                                              | SRSF10           | 21.264 | 252810000       |
| O95251                 | Histone acetyltransferase KAT7                                                                                                                                                                                                       | KAT7             | 21.098 | 322620000       |
| Q96PK6                 | RNA-binding protein 14                                                                                                                                                                                                               | RBM14            | 21.072 | 323240000       |
| P78417                 | Glutathione S-transferase omega-1                                                                                                                                                                                                    | GSTO1            | 20.076 | 298530000       |
| Q15637                 | Splicing factor 1                                                                                                                                                                                                                    | SF1              | 19.964 | 203050000       |
| Q9Y3X0                 | Coiled-coil domain-containing protein 9                                                                                                                                                                                              | CCDC9            | 19.556 | 200580000       |
| P37802                 | Transgelin-2                                                                                                                                                                                                                         | TAGLN2           | 18.717 | 109840000       |
| P25398                 | 40S ribosomal protein S12                                                                                                                                                                                                            | RPS12            | 18.698 | 890530000       |
| P05204, Q15651         | Non-histone chromosomal protein HMG-17; High mobility group nucleosome-binding domain-containing protein 3                                                                                                                           | HMGN2;<br>HMGN3  | 18.451 | 3609300000      |
| P61163                 | Alpha-centractin                                                                                                                                                                                                                     | ACTR1A           | 17.541 | 172770000       |
| Q96GD4                 | Aurora kinase B                                                                                                                                                                                                                      | AURKB            | 16.908 | 131280000       |
| P30837                 | Aldehyde dehydrogenase X, mitochondrial                                                                                                                                                                                              | ALDH1B1          | 16.448 | 77310000        |
| P13798                 | Acylamino-acid-releasing enzyme                                                                                                                                                                                                      | APEH             | 16.416 | 122950000       |

Table SI. Continued.

| A, Proteins identified exclusively from the control group |                                                                                                        |                 |        |                 |
|-----------------------------------------------------------|--------------------------------------------------------------------------------------------------------|-----------------|--------|-----------------|
| Protein ID                                                | Protein names                                                                                          | Gene names      | Score  | LFQ intensity C |
| P10155                                                    | 60 kDa SS-A/Ro ribonucleoprotein                                                                       | TROVE2          | 15.776 | 89383000        |
| Q8WYH8                                                    | Inhibitor of growth protein 5                                                                          | ING5            | 15.367 | 72410000        |
| P49916                                                    | DNA ligase 3                                                                                           | LIG3            | 14.973 | 39653000        |
| P48444                                                    | Coatomer subunit delta                                                                                 | ARCN1           | 14.838 | 224280000       |
| Q9HAF1                                                    | Chromatin modification-related protein MEAF6                                                           | MEAF6           | 14.693 | 139950000       |
| Q71RC2                                                    | La-related protein 4                                                                                   | LARP4           | 14.351 | 118210000       |
| Q9BZE1                                                    | 39S ribosomal protein L37, mitochondrial                                                               | MRPL37          | 14.229 | 111100000       |
| O75489                                                    | NADH dehydrogenase [ubiquinone] iron-sulfur protein 3, mitochondrial                                   | NDUFS3          | 14.051 | 55568000        |
| Q8NAV1                                                    | Pre-mRNA-splicing factor 38A                                                                           | PRPF38A         | 13.91  | 116640000       |
| P52926                                                    | High mobility group protein HMGI-C                                                                     | HMGGA2          | 13.781 | 324720000       |
| Q02880                                                    | DNA topoisomerase 2-beta                                                                               | TOP2B           | 13.776 | 125810000       |
| P26232                                                    | Catenin alpha-2                                                                                        | CTNNA2          | 13.73  | 38074000        |
| Q8N392                                                    | Rho GTPase-activating protein 18                                                                       | ARHGAP18        | 13.634 | 213180000       |
| O15145                                                    | Actin-related protein 2/3 complex subunit 3                                                            | ARPC3           | 13.633 | 66311000        |
| Q15102                                                    | Platelet-activating factor acetylhydrolase IB subunit gamma                                            | PAFAH1B3        | 13.607 | 71892000        |
| P29218                                                    | Inositol monophosphatase 1                                                                             | IMPA1           | 13.586 | 172670000       |
| P17480                                                    | Nucleolar transcription factor 1                                                                       | UBTF            | 13.568 | 189130000       |
| Q9Y6M1                                                    | Insulin-like growth factor 2 mRNA-binding protein 2                                                    | IGF2BP2         | 13.479 | 50807000        |
| Q5QJE6                                                    | Deoxynucleotidyltransferase terminal-interacting protein 2                                             | DNTTIP2         | 13.415 | 163720000       |
| Q8TDL5                                                    | BPI fold-containing family B member 1                                                                  | BPIFB1          | 13.343 | 74909000        |
| Q16543                                                    | Hsp90 co-chaperone Cdc37;Hsp90 co-chaperone Cdc37, N-terminally processed                              | CDC37           | 13.304 | 337960000       |
| O96008                                                    | Mitochondrial import receptor subunit TOM40 homolog                                                    | TOMM40          | 13.213 | 117600000       |
| P45973                                                    | Chromobox protein homolog 5                                                                            | CBX5            | 12.977 | 354170000       |
| P43490                                                    | Nicotinamide phosphoribosyltransferase                                                                 | NAMPT           | 12.937 | 99711000        |
| O95696                                                    | Bromodomain-containing protein 1                                                                       | BRD1            | 12.585 | 115130000       |
| P26447                                                    | Protein S100-A4                                                                                        | S100A4          | 12.48  | 506870000       |
| Q2TAY7                                                    | WD40 repeat-containing protein SMU1;WD40 repeat-containing protein SMU1, N-terminally processed        | SMU1            | 12.452 | 145140000       |
| Q9Y3B4                                                    | Splicing factor 3B subunit 6                                                                           | SF3B6           | 12.371 | 126970000       |
| P35270                                                    | Sepiapterin reductase                                                                                  | SPR             | 12.337 | 50928000        |
| Q07065                                                    | Cytoskeleton-associated protein 4                                                                      | CKAP4           | 11.796 | 119220000       |
| Q00059                                                    | Transcription factor A, mitochondrial                                                                  | TFAM            | 11.783 | 87645000        |
| P43487                                                    | Ran-specific GTPase-activating protein                                                                 | RANBP1          | 11.781 | 208950000       |
| O43684                                                    | Mitotic checkpoint protein BUB3                                                                        | BUB3            | 11.76  | 140230000       |
| P30520                                                    | Adenylosuccinate synthetase isozyme 2                                                                  | ADSS            | 11.737 | 50604000        |
| Q9NVJ2, Q96BM9                                            | ADP-ribosylation factor-like protein 8B; ADP-ribosylation factor-like protein 8A                       | ARL8B;<br>ARL8A | 11.7   | 40523000        |
| Q15020                                                    | Squamous cell carcinoma antigen recognized by T-cells 3                                                | SART3           | 11.664 | 30677000        |
| P49448, P00367                                            | Glutamate dehydrogenase 2, mitochondrial; Glutamate dehydrogenase 1, mitochondrial                     | GLUD2;<br>GLUD1 | 11.64  | 110260000       |
| P11172                                                    | Uridine 5-monophosphate synthase;Orotate phosphoribosyltransferase;Orotidine 5-phosphate decarboxylase | UMPS            | 11.632 | 112260000       |
| P52179                                                    | Myomesin-1                                                                                             | MYOM1           | 11.591 | 232660000       |
| P47914                                                    | 60S ribosomal protein L29                                                                              | RPL29           | 10.969 | 1304000000      |
| Q13620                                                    | Cullin-4B                                                                                              | CUL4B           | 10.888 | 23354000        |

Table SI. Continued.

## A, Proteins identified exclusively from the control group

| Protein ID             | Protein names                                                                                                                                                                      | Gene names                   | Score  | LFQ intensity C |
|------------------------|------------------------------------------------------------------------------------------------------------------------------------------------------------------------------------|------------------------------|--------|-----------------|
| Q9Y333                 | U6 snRNA-associated Sm-like protein LSM2                                                                                                                                           | LSM2                         | 10.859 | 56212000        |
| Q9H1E3                 | Nuclear ubiquitous casein and cyclin-dependent kinase substrate 1                                                                                                                  | NUCKS1                       | 10.837 | 125420000       |
| P55735                 | Protein SEC13 homolog                                                                                                                                                              | SEC13                        | 10.805 | 59831000        |
| P00568                 | Adenylate kinase isoenzyme 1                                                                                                                                                       | AK1                          | 10.759 | 34120000        |
| P30040                 | Endoplasmic reticulum resident protein 29                                                                                                                                          | ERP29                        | 10.657 | 63951000        |
| Q04837                 | Single-stranded DNA-binding protein, mitochondrial                                                                                                                                 | SSBP1                        | 10.444 | 91880000        |
| Q96RS6                 | NudC domain-containing protein 1                                                                                                                                                   | NUDCD1                       | 10.394 | 45657000        |
| Q9UGN5                 | Poly [ADP-ribose] polymerase 2                                                                                                                                                     | PARP2                        | 10.167 | 28171000        |
| P46379                 | Large proline-rich protein BAG6                                                                                                                                                    | BAG6                         | 9.9989 | 18006000        |
| Q7L2E3                 | Putative ATP-dependent RNA helicase DHX30                                                                                                                                          | DHX30                        | 9.9317 | 13060000        |
| Q9H4A5, Q9H4A6         | Golgi phosphoprotein 3-like; Golgi phosphoprotein 3                                                                                                                                | GOLPH3L;<br>GOLPH3           | 9.6169 | 22382000        |
| Q15942                 | Zyxin                                                                                                                                                                              | ZYX                          | 9.3533 | 48541000        |
| P54819                 | Adenylate kinase 2, mitochondrial; Adenylate kinase 2, mitochondrial, N-terminally processed                                                                                       | AK2                          | 9.2089 | 12996000        |
| Q9Y6Y8                 | SEC23-interacting protein                                                                                                                                                          | SEC23IP                      | 8.9612 | 151980000       |
| Q15293                 | Reticulocalbin-1                                                                                                                                                                   | RCN1                         | 8.8657 | 123970000       |
| Q9UNS2                 | COP9 signalosome complex subunit 3                                                                                                                                                 | COPS3                        | 8.7979 | 38395000        |
| O95299                 | NADH dehydrogenase [ubiquinone] 1 alpha subcomplex subunit 10, mitochondrial                                                                                                       | NDUFA10                      | 8.7207 | 71426000        |
| P13995                 | Bifunctional methylenetetrahydrofolate dehydrogenase/cyclohydrolase, mitochondrial; NAD-dependent methylenetetrahydrofolate dehydrogenase; Methenyltetrahydrofolate cyclohydrolase | MTHFD2                       | 8.6341 | 84786000        |
| Q96TA1                 | Niban-like protein 1                                                                                                                                                               | FAM129B                      | 8.6173 | 21532000        |
| Q9H2U2                 | Inorganic pyrophosphatase 2, mitochondrial                                                                                                                                         | PPA2                         | 8.5872 | 37053000        |
| Q6PKG0                 | La-related protein 1                                                                                                                                                               | LARP1                        | 8.5723 | 20312000        |
| P21283                 | V-type proton ATPase subunit C 1                                                                                                                                                   | ATP6V1C1                     | 8.518  | 27809000        |
| P08397                 | Porphobilinogen deaminase                                                                                                                                                          | HMBS                         | 8.3741 | 12306000        |
| Q9Y2S7                 | Polymerase delta-interacting protein 2                                                                                                                                             | POLDIP2                      | 8.3482 | 59337000        |
| Q9Y4P3                 | Transducin beta-like protein 2                                                                                                                                                     | TBL2                         | 8.3189 | 85523000        |
| P35659                 | Protein DEK                                                                                                                                                                        | DEK                          | 8.2755 | 133040000       |
| O60306                 | Intron-binding protein aquarius                                                                                                                                                    | AQR                          | 8.1658 | 28172000        |
| Q9BYD3                 | 39S ribosomal protein L4, mitochondrial                                                                                                                                            | MRPL4                        | 7.9664 | 42378000        |
| Q14847                 | LIM and SH3 domain protein 1                                                                                                                                                       | LASP1                        | 7.9618 | 97316000        |
| P55036                 | 26S proteasome non-ATPase regulatory subunit 4                                                                                                                                     | PSMD4                        | 7.9147 | 79363000        |
| O14773                 | Tripeptidyl-peptidase 1                                                                                                                                                            | TPP1                         | 7.7652 | 40094000        |
| P13164, Q01629, Q01628 | Interferon-induced transmembrane protein 1; Interferon-induced transmembrane protein 2; Interferon-induced transmembrane protein 3                                                 | IFITM1;<br>IFITM2;<br>IFITM3 | 7.6686 | 117750000       |
| P02647                 | Apolipoprotein A-I;Proapolipoprotein A-I; Truncated apolipoprotein A-I                                                                                                             | APOA1                        | 7.6336 | 52862000        |
| Q86XP3                 | ATP-dependent RNA helicase DDX42                                                                                                                                                   | DDX42                        | 7.6285 | 83576000        |
| Q9C005                 | Protein dpy-30 homolog                                                                                                                                                             | DPY30                        | 7.5805 | 14926000        |
| P31942                 | Heterogeneous nuclear ribonucleoprotein H3                                                                                                                                         | HNRNPH3                      | 7.5556 | 28312000        |
| Q9H6S3                 | Epidermal growth factor receptor kinase substrate 8-like protein 2                                                                                                                 | EPS8L2                       | 7.4977 | 23413000        |
| P55081                 | Microfibrillar-associated protein 1                                                                                                                                                | MFAP1                        | 7.4014 | 60286000        |
| Q99590                 | Protein SCAF11                                                                                                                                                                     | SCAF11                       | 7.3855 | 62433000        |
| Q9Y4R8                 | Telomere length regulation protein TEL2 homolog                                                                                                                                    | TELO2                        | 7.3402 | 10478000        |
| Q7Z5K2                 | Wings apart-like protein homolog                                                                                                                                                   | WAPAL                        | 7.3234 | 8771700         |

Table SI. Continued.

## A, Proteins identified exclusively from the control group

| Protein ID                     | Protein names                                                                                                                                      | Gene names                                  | Score  | LFQ intensity C |
|--------------------------------|----------------------------------------------------------------------------------------------------------------------------------------------------|---------------------------------------------|--------|-----------------|
| O75821                         | Eukaryotic translation initiation factor 3 subunit G                                                                                               | EIF3G                                       | 7.3089 | 97229000        |
| Q13442                         | 28 kDa heat- and acid-stable phosphoprotein                                                                                                        | PDAP1                                       | 7.302  | 79205000        |
| Q9HAV4                         | Exportin-5                                                                                                                                         | XPO5                                        | 7.2597 | 14824000        |
| P09669                         | Cytochrome c oxidase subunit 6C                                                                                                                    | COX6C                                       | 7.2416 | 66372000        |
| Q12797                         | Aspartyl/asparaginyl beta-hydroxylase                                                                                                              | ASPH                                        | 7.2301 | 39834000        |
| Q9UHY7                         | Enolase-phosphatase E1                                                                                                                             | ENOPH1                                      | 7.1334 | 34938000        |
| O43765                         | Small glutamine-rich tetratricopeptide repeat-containing protein alpha                                                                             | SGTA                                        | 7.0495 | 38895000        |
| O43660                         | Pleiotropic regulator 1                                                                                                                            | PLRG1                                       | 7.037  | 99532000        |
| Q99584                         | Protein S100-A13                                                                                                                                   | S100A13                                     | 7.024  | 18476000        |
| Q9Y3C6                         | Peptidyl-prolyl cis-trans isomerase-like 1                                                                                                         | PPIL1                                       | 7.0114 | 105070000       |
| Q15349, Q15418, P51812, Q9UK32 | Ribosomal protein S6 kinase alpha-2; Ribosomal protein S6 kinase alpha-1; Ribosomal protein S6 kinase alpha-3; Ribosomal protein S6 kinase alpha-6 | RPS6KA2;<br>RPS6KA1;<br>RPS6KA3;<br>RPS6KA6 | 7.0006 | 7906700         |
| P49189                         | 4-trimethylaminobutyraldehyde dehydrogenase                                                                                                        | ALDH9A1                                     | 6.9924 | 54541000        |
| O00425                         | Insulin-like growth factor 2 mRNA-binding protein 3                                                                                                | IGF2BP3                                     | 6.986  | 40717000        |
| Q14651                         | Plastin-1                                                                                                                                          | PLS1                                        | 6.9606 | 18415000        |
| P62308, A8MWD9                 | Small nuclear ribonucleoprotein G; Putative small nuclear ribonucleoprotein G-like protein 15                                                      | SNRPG;<br>SNRPGP15                          | 6.9061 | 21468000        |
| Q52LW3                         | Rho GTPase-activating protein 29                                                                                                                   | ARHGAP29                                    | 6.8871 | 42140000        |
| P22087                         | rRNA 2-O-methyltransferase fibrillar                                                                                                               | FBL                                         | 6.8636 | 154890000       |
| A0MZ66                         | Shootin-1                                                                                                                                          | KIAA1598                                    | 6.8473 | 59029000        |
| Q9NX40                         | OCIA domain-containing protein 1                                                                                                                   | OCIAD1                                      | 6.8221 | 25480000        |
| Q9UGM3                         | Deleted in malignant brain tumors 1 protein                                                                                                        | DMBT1                                       | 6.819  | 136210000       |
| P60891, P21108, P11908         | Ribose-phosphate pyrophosphokinase 1; Ribose-phosphate pyrophosphokinase 3; Ribose-phosphate pyrophosphokinase 2                                   | PRPS1;<br>PRPS1L1;<br>PRPS2                 | 6.8094 | 163200000       |
| Q9Y3E5                         | Peptidyl-tRNA hydrolase 2, mitochondrial                                                                                                           | PTRH2                                       | 6.7889 | 25068000        |
| Q71UM5, P42677                 | 40S ribosomal protein S27-like; 40S ribosomal protein S27                                                                                          | RPS27L;<br>RPS27                            | 6.7282 | 211750000       |
| O00267                         | Transcription elongation factor SPT5                                                                                                               | SUPT5H                                      | 6.6906 | 38420000        |
| O75112                         | LIM domain-binding protein 3                                                                                                                       | LDB3                                        | 6.6605 | 47875000        |
| Q7Z417                         | Nuclear fragile X mental retardation-interacting protein 2                                                                                         | NUFIP2                                      | 6.638  | 131740000       |
| Q14728                         | Major facilitator superfamily domain-containing protein 10                                                                                         | MFSD10                                      | 6.5781 | 9428700         |
| Q96FW1                         | Ubiquitin thioesterase OTUB1                                                                                                                       | OTUB1                                       | 6.5594 | 38124000        |
| O95793                         | Double-stranded RNA-binding protein Staufen homolog 1                                                                                              | STAU1                                       | 6.5297 | 14136000        |
| O00479                         | High mobility group nucleosome-binding domain-containing protein 4                                                                                 | HMGN4                                       | 6.4943 | 251720000       |
| Q99735                         | Microsomal glutathione S-transferase 2                                                                                                             | MGST2                                       | 6.4607 | 61264000        |
| P0DPI3, A0A0U1RR11, A0A0U1RR16 | Centromere protein V-like protein 2                                                                                                                | CENPVL2                                     | 6.4565 | 274710000       |
| Q9UKD2                         | mRNA turnover protein 4 homolog                                                                                                                    | MRT04                                       | 6.4349 | 21955000        |
| Q15435                         | Protein phosphatase 1 regulatory subunit 7                                                                                                         | PPP1R7                                      | 6.4256 | 22657000        |
| P22223                         | Cadherin-3                                                                                                                                         | CDH3                                        | 6.3783 | 41075000        |
| Q16401                         | 26S proteasome non-ATPase regulatory subunit 5                                                                                                     | PSMD5                                       | 6.3656 | 84213000        |
| Q9BUQ8                         | Probable ATP-dependent RNA helicase DDX23                                                                                                          | DDX23                                       | 6.3619 | 105800000       |
| O15511                         | Actin-related protein 2/3 complex subunit 5                                                                                                        | ARPC5                                       | 6.3492 | 69172000        |
| Q14980                         | Nuclear mitotic apparatus protein 1                                                                                                                | NUMA1                                       | 6.342  | 144390000       |
| Q7RTY8                         | Transmembrane protease serine 7                                                                                                                    | TMPRSS7                                     | 6.3025 | 211200000       |

Table SI. Continued.

| A, Proteins identified exclusively from the control group   |                                                                                                                  |                        |        |                 |
|-------------------------------------------------------------|------------------------------------------------------------------------------------------------------------------|------------------------|--------|-----------------|
| Protein ID                                                  | Protein names                                                                                                    | Gene names             | Score  | LFQ intensity C |
| Q9BTC8, O94776,<br>Q13330                                   | Metastasis-associated protein MTA3;<br>Metastasis-associated protein MTA2;<br>Metastasis-associated protein MTA1 | MTA3;<br>MTA2;<br>MTA1 | 6.2959 | 45245000        |
| Q05519                                                      | Serine/arginine-rich splicing factor 11                                                                          | SRSF11                 | 6.2896 | 51065000        |
| P30044                                                      | Peroxiredoxin-5, mitochondrial                                                                                   | PRDX5                  | 6.2791 | 111720000       |
| P62877                                                      | E3 ubiquitin-protein ligase RBX1;<br>E3 ubiquitin-protein ligase RBX1, N-terminally<br>processed                 | RBX1                   | 6.2403 | 164030000       |
| Q15056                                                      | Eukaryotic translation initiation factor 4H                                                                      | EIF4H                  | 6.178  | 88846000        |
| P19823                                                      | Inter-alpha-trypsin inhibitor heavy chain H2                                                                     | ITIH2                  | 6.1716 | 56221000        |
| Q9BWD1                                                      | Acetyl-CoA acetyltransferase, cytosolic                                                                          | ACAT2                  | 6.1564 | 153540000       |
| P45378                                                      | Troponin T, fast skeletal muscle                                                                                 | TNNT3                  | 6.1528 | 222250000       |
| P49406                                                      | 39S ribosomal protein L19, mitochondrial                                                                         | MRPL19                 | 6.1149 | 21944000        |
| P49821                                                      | NADH dehydrogenase [ubiquinone]<br>flavoprotein 1, mitochondrial                                                 | NDUFV1                 | 6.1062 | 55141000        |
| P48735                                                      | Isocitrate dehydrogenase [NADP], mitochondrial                                                                   | IDH2                   | 6.1042 | 20525000        |
| Q9C037                                                      | E3 ubiquitin-protein ligase TRIM4                                                                                | TRIM4                  | 6.1031 | 2722200000      |
| O95671                                                      | N-acetylserotonin O-methyltransferase-like<br>protein                                                            | ASMTL                  | 6.0809 | 7807400         |
| Q9UKM9                                                      | RNA-binding protein Raly                                                                                         | RALY                   | 6.0511 | 86480000        |
| Q9NZL9                                                      | Methionine adenosyltransferase 2 subunit beta                                                                    | MAT2B                  | 6.0503 | 84751000        |
| P36543                                                      | V-type proton ATPase subunit E 1                                                                                 | ATP6V1E1               | 5.9641 | 23939000        |
| P62273                                                      | 40S ribosomal protein S29                                                                                        | RPS29                  | 5.9512 | 119410000       |
| Q8N8S7                                                      | Protein enabled homolog                                                                                          | ENAH                   | 5.9397 | 22021000        |
| P41227                                                      | N-alpha-acetyltransferase 10                                                                                     | NAA10                  | 5.9265 | 160770000       |
| Q9H773                                                      | dCTP pyrophosphatase 1                                                                                           | DCTPP1                 | 5.9262 | 71081000        |
| Q96SB4                                                      | SRSF protein kinase 1                                                                                            | SRPK1                  | 5.9023 | 23563000        |
| P51398                                                      | 28S ribosomal protein S29, mitochondrial                                                                         | DAP3                   | 5.8812 | 102560000       |
| Q8IYS1                                                      | Peptidase M20 domain-containing protein 2                                                                        | PM20D2                 | 5.8178 | 17083000        |
| P48637                                                      | Glutathione synthetase                                                                                           | GSS                    | 5.75   | 28537000        |
| Q16878                                                      | Cysteine dioxygenase type 1                                                                                      | CDO1                   | 5.7496 | 91100000        |
| B, Proteins identified exclusively from the treatment group |                                                                                                                  |                        |        |                 |
| P06454                                                      | Prothymosin alpha; Prothymosin alpha,<br>N-terminally processed; Thymosin alpha-1                                | PTMA                   | 29.992 | 746080000       |
| P12270                                                      | Nucleoprotein TPR                                                                                                | TPR                    | 27.072 | 71567000        |
| P13805, P45379                                              | Troponin T, slow skeletal muscle; Troponin T,<br>cardiac muscle                                                  | TNNT1;<br>TNNT2        | 25.031 | 319550000       |
| P00390                                                      | Glutathione reductase, mitochondrial                                                                             | GSR                    | 22.086 | 287920000       |
| Q01650, Q9UM01,<br>Q92536                                   | Large neutral amino acids transporter small<br>subunit 1                                                         | SLC7A5                 | 21.929 | 250720000       |
| P51659                                                      | Peroxisomal multifunctional enzyme type 2;<br>(3R)-hydroxyacyl-CoA dehydrogenase;<br>Enoyl-CoA hydratase 2       | HSD17B4                | 20.509 | 240380000       |
| P63208                                                      | S-phase kinase-associated protein 1                                                                              | SKP1                   | 18.997 | 374270000       |
| P10599                                                      | Thioredoxin                                                                                                      | TXN                    | 17.698 | 394770000       |
| O75396                                                      | Vesicle-trafficking protein SEC22b                                                                               | SEC22B                 | 15.014 | 127550000       |
| P49589                                                      | Cysteine-tRNA ligase, cytoplasmic                                                                                | CARS                   | 14.541 | 68068000        |
| O75400                                                      | Pre-mRNA-processing factor 40 homolog A                                                                          | PRPF40A                | 14.24  | 468870000       |
| Q92973                                                      | Transportin-1                                                                                                    | TNPO1                  | 14.014 | 250110000       |
| P61224, A6NIZ1, P62834                                      | Ras-related protein Rap-1b; Ras-related protein<br>Rap-1b-like protein; Ras-related protein Rap-1A               | RAP1B;<br>RAP1A        | 13.55  | 140090000       |
| Q13561                                                      | Dynactin subunit 2                                                                                               | DCTN2                  | 13.387 | 129160000       |



Table SI. Continued.

| B, Proteins identified exclusively from the treatment group |                                                                                                                                                                                                           |                    |        |                 |
|-------------------------------------------------------------|-----------------------------------------------------------------------------------------------------------------------------------------------------------------------------------------------------------|--------------------|--------|-----------------|
| Protein ID                                                  | Protein names                                                                                                                                                                                             | Gene names         | Score  | LFQ intensity C |
| Q9H7D7                                                      | WD repeat-containing protein 26                                                                                                                                                                           | WDR26              | 13.277 | 68161000        |
| P13797                                                      | Plastin-3                                                                                                                                                                                                 | PLS3               | 13.179 | 174640000       |
| O95573, O60488                                              | Long-chain-fatty-acid-CoA ligase 3;<br>Long-chain-fatty-acid-CoA ligase 4                                                                                                                                 | ACSL3;<br>ACSL4    | 13.167 | 261590000       |
| O95782, O94973                                              | AP-2 complex subunit alpha-1; AP-2 complex<br>subunit alpha-2                                                                                                                                             | AP2A1;<br>AP2A2    | 13.143 | 78940000        |
| P61513                                                      | 60S ribosomal protein L37a                                                                                                                                                                                | RPL37A             | 13.13  | 627010000       |
| Q08380                                                      | Galectin-3-binding protein                                                                                                                                                                                | LGALS3BP           | 12.806 | 120740000       |
| P50851                                                      | Lipopolysaccharide-responsive and beige-like<br>anchor protein                                                                                                                                            | LRBA               | 12.664 | 123910000       |
| P67812, P0C7V7                                              | Signal peptidase complex catalytic subunit<br>SEC11A; Putative signal peptidase complex<br>catalytic subunit SEC11B                                                                                       | SEC11A;<br>SEC11B  | 12.579 | 12722000        |
| Q86SG5, P31151                                              | Protein S100-A7A; Protein S100-A7                                                                                                                                                                         | S100A7A;<br>S100A7 | 12.554 | 157300000       |
| P00387                                                      | NADH-cytochrome b5 reductase 3;<br>NADH-cytochrome b5 reductase<br>3 membrane-bound form; NADH-cytochrome<br>b5 reductase 3 soluble form                                                                  | CYB5R3             | 12.235 | 77401000        |
| Q15125                                                      | 3-beta-hydroxysteroid-Delta(8),<br>Delta(7)-isomerase                                                                                                                                                     | EBP                | 12.22  | 178060000       |
| P78330                                                      | Phosphoserine phosphatase                                                                                                                                                                                 | PSPH               | 12.205 | 261420000       |
| P35580                                                      | Myosin-10                                                                                                                                                                                                 | MYH10              | 12.177 | 47580000        |
| P42285                                                      | Superkiller viralicidic activity 2-like 2                                                                                                                                                                 | SKIV2L2            | 12.174 | 18014000        |
| Q15149                                                      | Plectin                                                                                                                                                                                                   | PLEC               | 12.118 | 45231000        |
| P20073                                                      | Annexin A7                                                                                                                                                                                                | ANXA7              | 11.805 | 132300000       |
| Q08188                                                      | Protein-glutamine gamma-glutamyltransferase E;<br>Protein-glutamine gamma-glutamyltransferase E<br>50 kDa catalytic chain; Protein-glutamine<br>gamma-glutamyltransferase E 27 kDa<br>non-catalytic chain | TGM3               | 11.755 | 88032000        |
| Q6IBS0                                                      | Twinfilin-2                                                                                                                                                                                               | TWF2               | 11.617 | 128710000       |
| Q6Y1H2                                                      | Very-long-chain (3R)-3-hydroxyacyl-CoA<br>dehydratase 2                                                                                                                                                   | HACD2              | 11.537 | 101500000       |
| P50416                                                      | Carnitine O-palmitoyltransferase 1, liver isoform                                                                                                                                                         | CPT1A              | 11.462 | 127170000       |
| Q15392                                                      | Delta(24)-sterol reductase                                                                                                                                                                                | DHCR24             | 11.435 | 173260000       |
| P22735                                                      | Protein-glutamine gamma-glutamyltransferase K                                                                                                                                                             | TGM1               | 11.244 | 108190000       |
| Q96IX5                                                      | Up-regulated during skeletal muscle growth<br>protein 5                                                                                                                                                   | USMG5              | 10.855 | 201500000       |
| P63316                                                      | Troponin C, slow skeletal and cardiac muscles                                                                                                                                                             | TNNC1              | 10.559 | 2007600000      |
| P43307                                                      | Translocon-associated protein subunit alpha                                                                                                                                                               | SSR1               | 9.9938 | 48527000        |
| Q9P287                                                      | BRCA2 and CDKN1A-interacting protein                                                                                                                                                                      | BCCIP              | 9.4148 | 181800000       |
| Q12792                                                      | Twinfilin-1                                                                                                                                                                                               | TWF1               | 9.4022 | 69681000        |
| Q8IWE2                                                      | Protein NOXP20                                                                                                                                                                                            | FAM114A1           | 9.3796 | 17449000        |
| P53602                                                      | Diphosphomevalonate decarboxylase                                                                                                                                                                         | MVD                | 9.2759 | 91290000        |
| Q9UBS4                                                      | DnaJ homolog subfamily B member 11                                                                                                                                                                        | DNAJB11            | 9.007  | 52390000        |
| Q9BZZ5                                                      | Apoptosis inhibitor 5                                                                                                                                                                                     | API5               | 8.9218 | 72570000        |
| Q9NUU7, Q9UMR2                                              | ATP-dependent RNA helicase DDX19A;<br>ATP-dependent RNA helicase DDX19B                                                                                                                                   | DDX19A;<br>DDX19B  | 8.8763 | 81349000        |
| Q6PID8                                                      | Kelch domain-containing protein 10                                                                                                                                                                        | KLHDC10            | 8.8357 | 211910000       |
| P08574                                                      | Cytochrome c1, heme protein, mitochondrial                                                                                                                                                                | CYC1               | 8.1949 | 276130000       |
| P26358                                                      | DNA (cytosine-5)-methyltransferase 1                                                                                                                                                                      | DNMT1              | 8.1832 | 53083000        |
| Q15555                                                      | Microtubule-associated protein RP/EB family<br>member 2                                                                                                                                                   | MAPRE2             | 8.1481 | 33667000        |

Table SI. Continued.

## B, Proteins identified exclusively from the treatment group

| Protein ID                                                                                                     | Protein names                                                                                                                                                                                                                                                                                                                                                                                        | Gene names                                                                                                     | Score  | LFQ intensity C |
|----------------------------------------------------------------------------------------------------------------|------------------------------------------------------------------------------------------------------------------------------------------------------------------------------------------------------------------------------------------------------------------------------------------------------------------------------------------------------------------------------------------------------|----------------------------------------------------------------------------------------------------------------|--------|-----------------|
| Q92544                                                                                                         | Transmembrane 9 superfamily member 4                                                                                                                                                                                                                                                                                                                                                                 | TM9SF4                                                                                                         | 7.8007 | 41110000        |
| Q9BU76                                                                                                         | Multiple myeloma tumor-associated protein 2                                                                                                                                                                                                                                                                                                                                                          | MMTAG2                                                                                                         | 7.7483 | 44506000        |
| Q13616                                                                                                         | Cullin-1                                                                                                                                                                                                                                                                                                                                                                                             | CUL1                                                                                                           | 7.7307 | 37433000        |
| O00139, Q99661                                                                                                 | Kinesin-like protein KIF2A; Kinesin-like protein KIF2C                                                                                                                                                                                                                                                                                                                                               | KIF2A;<br>KIF2C                                                                                                | 7.7242 | 9239300         |
| Q14192                                                                                                         | Four and a half LIM domains protein 2                                                                                                                                                                                                                                                                                                                                                                | FHL2                                                                                                           | 7.6913 | 80938000        |
| Q9UJV9                                                                                                         | Probable ATP-dependent RNA helicase DDX41                                                                                                                                                                                                                                                                                                                                                            | DDX41                                                                                                          | 7.6138 | 65413000        |
| Q53H12                                                                                                         | Acylglycerol kinase, mitochondrial                                                                                                                                                                                                                                                                                                                                                                   | AGK                                                                                                            | 7.5084 | 47881000        |
| Q9BSJ8                                                                                                         | Extended synaptotagmin-1                                                                                                                                                                                                                                                                                                                                                                             | ESYT1                                                                                                          | 7.4551 | 63537000        |
| P05089                                                                                                         | Arginase-1                                                                                                                                                                                                                                                                                                                                                                                           | ARG1                                                                                                           | 7.4522 | 27934000        |
| Q6ZU65                                                                                                         | Ubiquitin-2                                                                                                                                                                                                                                                                                                                                                                                          | UBN2                                                                                                           | 7.4261 | 1330200000      |
| P67870                                                                                                         | Casein kinase II subunit beta                                                                                                                                                                                                                                                                                                                                                                        | CSNK2B                                                                                                         | 7.4005 | 206610000       |
| P46926                                                                                                         | Glucosamine-6-phosphate isomerase 1                                                                                                                                                                                                                                                                                                                                                                  | GNPDA1                                                                                                         | 7.3128 | 34752000        |
| Q9UNL2                                                                                                         | Translocon-associated protein subunit gamma                                                                                                                                                                                                                                                                                                                                                          | SSR3                                                                                                           | 7.2825 | 129090000       |
| Q9UBM7                                                                                                         | 7-dehydrocholesterol reductase                                                                                                                                                                                                                                                                                                                                                                       | DHCR7                                                                                                          | 7.2774 | 96363000        |
| Q9Y2Z0                                                                                                         | Suppressor of G2 allele of SKP1 homolog                                                                                                                                                                                                                                                                                                                                                              | SUGT1                                                                                                          | 7.1814 | 54500000        |
| O43324                                                                                                         | Eukaryotic translation elongation factor 1 epsilon-1                                                                                                                                                                                                                                                                                                                                                 | EEF1E1                                                                                                         | 7.1617 | 35545000        |
| Q8NF37                                                                                                         | Lysophosphatidylcholine acyltransferase 1                                                                                                                                                                                                                                                                                                                                                            | LPCAT1                                                                                                         | 6.9776 | 14443000        |
| Q969U6                                                                                                         | F-box/WD repeat-containing protein 5                                                                                                                                                                                                                                                                                                                                                                 | FBXW5                                                                                                          | 6.9484 | 87237000        |
| Q02045                                                                                                         | Myosin light chain 5                                                                                                                                                                                                                                                                                                                                                                                 | MYL5                                                                                                           | 6.9263 | 1405900000      |
| Q9NWU5                                                                                                         | 39S ribosomal protein L22, mitochondrial                                                                                                                                                                                                                                                                                                                                                             | MRPL22                                                                                                         | 6.8631 | 71570000        |
| P38606                                                                                                         | V-type proton ATPase catalytic subunit A                                                                                                                                                                                                                                                                                                                                                             | ATP6V1A                                                                                                        | 6.7896 | 153380000       |
| Q15005                                                                                                         | Signal peptidase complex subunit 2                                                                                                                                                                                                                                                                                                                                                                   | SPCS2                                                                                                          | 6.7438 | 90211000        |
| Q93009                                                                                                         | Ubiquitin carboxyl-terminal hydrolase 7                                                                                                                                                                                                                                                                                                                                                              | USP7                                                                                                           | 6.7343 | 36706000        |
| P46976                                                                                                         | Glycogenin-1                                                                                                                                                                                                                                                                                                                                                                                         | GYG1                                                                                                           | 6.727  | 36748000        |
| Q92925                                                                                                         | SWI/SNF-related matrix-associated actin-dependent regulator of chromatin subfamily D member 2                                                                                                                                                                                                                                                                                                        | SMARCD2                                                                                                        | 6.7138 | 38458000        |
| P02794                                                                                                         | Ferritin heavy chain; Ferritin heavy chain, N-terminally processed                                                                                                                                                                                                                                                                                                                                   | FTH1                                                                                                           | 6.6652 | 70323000        |
| O60573                                                                                                         | Eukaryotic translation initiation factor 4E type 2                                                                                                                                                                                                                                                                                                                                                   | EIF4E2                                                                                                         | 6.5895 | 49979000        |
| P10321                                                                                                         | HLA class I histocompatibility antigen, Cw-7 alpha chain                                                                                                                                                                                                                                                                                                                                             | HLA-C                                                                                                          | 6.5693 | 309980000       |
| Q99988                                                                                                         | Growth/differentiation factor 15                                                                                                                                                                                                                                                                                                                                                                     | GDF15                                                                                                          | 6.337  | 102800000       |
| P21741                                                                                                         | Midkine                                                                                                                                                                                                                                                                                                                                                                                              | MDK                                                                                                            | 6.333  | 55665000        |
| P08962                                                                                                         | CD63 antigen                                                                                                                                                                                                                                                                                                                                                                                         | CD63                                                                                                           | 6.2853 | 96240000        |
| Q9H8S9, Q7L9L4                                                                                                 | MOB kinase activator 1A; MOB kinase activator 1B                                                                                                                                                                                                                                                                                                                                                     | MOB1A;<br>MOB1B                                                                                                | 6.2728 | 62670000        |
| Q00535, P06493, P24941, P11802, Q00526, Q00534, P50750, Q96Q40, O94921, Q07002, Q00536, Q00537, Q9NYV4, Q14004 | Cyclin-dependent-like kinase 5; Cyclin-dependent kinase 1; Cyclin-dependent kinase 2; Cyclin-dependent kinase 4; Cyclin-dependent kinase 3; Cyclin-dependent kinase 6; Cyclin-dependent kinase 9; Cyclin-dependent kinase 15; Cyclin-dependent kinase 14; Cyclin-dependent kinase 18; Cyclin-dependent kinase 16; Cyclin-dependent kinase 17; Cyclin-dependent kinase 12; Cyclin-dependent kinase 13 | CDK5; CDK1;<br>CDK2; CDK4;<br>CDK3; CDK6;<br>CDK9; CDK15;<br>CDK14;<br>CDK18; CDK16;<br>CDK17; CDK12;<br>CDK13 | 6.2004 | 78072000        |
| Q02218                                                                                                         | 2-oxoglutarate dehydrogenase, mitochondrial                                                                                                                                                                                                                                                                                                                                                          | OGDH                                                                                                           | 6.1691 | 34970000        |
| O95399                                                                                                         | Urotensin-2                                                                                                                                                                                                                                                                                                                                                                                          | UTS2                                                                                                           | 6.1257 | 2444600000      |
| P48509                                                                                                         | CD151 antigen                                                                                                                                                                                                                                                                                                                                                                                        | CD151                                                                                                          | 6.1135 | 174470000       |
| Q8TCJ2                                                                                                         | Dolichyl-diphosphooligosaccharide-protein glycosyltransferase subunit STT3B                                                                                                                                                                                                                                                                                                                          | STT3B                                                                                                          | 6.0897 | 12195000        |
| Q15363                                                                                                         | Transmembrane emp24 domain-containing protein 2                                                                                                                                                                                                                                                                                                                                                      | TMED2                                                                                                          | 6.0587 | 81670000        |
| O75477                                                                                                         | Erlin-1                                                                                                                                                                                                                                                                                                                                                                                              | ERLIN1                                                                                                         | 6.0509 | 5513600         |

Table SI. Continued.

| B, Proteins identified exclusively from the treatment group       |                                                                                                                                                      |                                                                  |        |                 |
|-------------------------------------------------------------------|------------------------------------------------------------------------------------------------------------------------------------------------------|------------------------------------------------------------------|--------|-----------------|
| Protein ID                                                        | Protein names                                                                                                                                        | Gene names                                                       | Score  | LFQ intensity C |
| P14210                                                            | Hepatocyte growth factor;Hepatocyte growth factor alpha chain;Hepatocyte growth factor beta chain                                                    | HGF                                                              | 6.0319 | 398190000       |
| Q8N983                                                            | 39S ribosomal protein L43, mitochondrial                                                                                                             | MRPL43                                                           | 6.0242 | 57328000        |
| P62633                                                            | Cellular nucleic acid-binding protein                                                                                                                | CNBP                                                             | 5.9868 | 21415000        |
| Q9Y6E0                                                            | Serine/threonine-protein kinase 24; Serine/threonine-protein kinase 24 36 kDa subunit; Serine/threonine-protein kinase 24 12 kDa subunit             | STK24                                                            | 5.9789 | 14991000        |
| O43264                                                            | Centromere/kinetochore protein zw10 homolog                                                                                                          | ZW10                                                             | 5.969  | 21914000        |
| Q14498                                                            | RNA-binding protein 39                                                                                                                               | RBM39                                                            | 5.9305 | 19987000        |
| P23229                                                            | Integrin alpha-6;Integrin alpha-6 heavy chain; Integrin alpha-6 light chain; Processed integrin alpha-6                                              | ITGA6                                                            | 5.9102 | 23590000        |
| Q7L014                                                            | Probable ATP-dependent RNA helicase DDX46                                                                                                            | DDX46                                                            | 5.8982 | 39125000        |
| O43854                                                            | EGF-like repeat and discoidin I-like domain-containing protein 3                                                                                     | EDIL3                                                            | 5.8962 | 99629000        |
| Q9HCY8                                                            | Protein S100-A14                                                                                                                                     | S100A14                                                          | 5.8779 | 58058000        |
| O43598                                                            | 2-deoxynucleoside 5-phosphate N-hydrolase 1                                                                                                          | DNPH1                                                            | 5.8753 | 14677000        |
| Q15111, Q9UPR0                                                    | Inactive phospholipase C-like protein 1; Inactive phospholipase C-like protein 2                                                                     | PLCL1;PLCL2                                                      | 5.8721 | 386260000       |
| P52815                                                            | 39S ribosomal protein L12, mitochondrial                                                                                                             | MRPL12                                                           | 5.8683 | 139020000       |
| Q8N1F7                                                            | Nuclear pore complex protein Nup93                                                                                                                   | NUP93                                                            | 5.8567 | 79929000        |
| Q8NHH1                                                            | Tubulin polyglutamylase TTLL11                                                                                                                       | TTLL11                                                           | 5.8387 | 1007500000      |
| C, Proteins identified from both the control and treatment groups |                                                                                                                                                      |                                                                  |        |                 |
| P62805                                                            | Histone H4                                                                                                                                           | HIST1H4A                                                         | 101.43 | 1.8747E+11      |
| Q16778, P33778, P23527, P06899, Q6DRA6, Q6DN03                    | Histone H2B type 2-E; Histone H2B type 1-B; Histone H2B type 1-O; Histone H2B type 1-J; Putative histone H2B type 2-D; Putative histone H2B type 2-C | HIST2H2BE; HIST1H2BB; HIST1H2BO; HIST1H2BJ; HIST2H2BD; HIST2H2BC | 100.8  | 1.279E+11       |
| P02768                                                            | Serum albumin                                                                                                                                        | ALB                                                              | 302.7  | 1.2107E+11      |
| P20671                                                            | Histone H2A type 1-D                                                                                                                                 | HIST1H2AD                                                        | 71.479 | 1.2104E+11      |
| P68431, Q16695, Q6NXT2                                            | Histone H3.1; Histone H3.1t; Histone H3.3C                                                                                                           | HIST1H3A; HIST3H3; H3F3C                                         | 96.179 | 1.0239E+11      |
| P60709, Q6S8J3, A5A3E0, Q562R1, P0CG38, P0CG39, Q9BYX7            | Actin, cytoplasmic 1; Actin, cytoplasmic 1, N-terminally processed                                                                                   | ACTB                                                             | 219.8  | 91388000000     |
| P16403                                                            | Histone H1.2                                                                                                                                         | HIST1H1C                                                         | 113.32 | 81953000000     |
| P12882                                                            | Myosin-1                                                                                                                                             | MYH1                                                             | 323.31 | 63566000000     |
| P68104, Q5VTE0                                                    | Elongation factor 1-alpha 1; Putative elongation factor 1-alpha-like 3                                                                               | EEF1A1; EEF1A1P5                                                 | 175.49 | 53649000000     |
| P68133, P68032, P62736, P63267                                    | Actin, alpha skeletal muscle; Actin, alpha cardiac muscle 1; Actin, aortic smooth muscle; Actin, gamma-enteric smooth muscle                         | ACTA1;ACTC1; ACTA2;ACTG2                                         | 92.449 | 47058000000     |
| P08238, Q58FF7, Q92538                                            | Heat shock protein HSP 90-beta                                                                                                                       | HSP90AB1                                                         | 323.31 | 46029000000     |
| P11142, P54652                                                    | Heat shock cognate 71 kDa protein                                                                                                                    | HSPA8                                                            | 323.31 | 37748000000     |
| P38646                                                            | Stress-70 protein, mitochondrial                                                                                                                     | HSPA9                                                            | 323.31 | 35221000000     |
| P04406, O14556                                                    | Glyceraldehyde-3-phosphate dehydrogenase                                                                                                             | GAPDH                                                            | 187.46 | 31945000000     |
| P14618                                                            | Pyruvate kinase PKM                                                                                                                                  | PKM                                                              | 323.31 | 26967000000     |
| P17096                                                            | High mobility group protein HMG-I/HMG-Y                                                                                                              | HMGA1                                                            | 54.78  | 26783000000     |
| P13639                                                            | Elongation factor 2                                                                                                                                  | EEF2                                                             | 323.31 | 24899000000     |



Table SI. Continued.

| C, Proteins identified from both the control and treatment groups |                                                                                                                                                                                                                                                                                                                                                          |                                                            |        |                 |
|-------------------------------------------------------------------|----------------------------------------------------------------------------------------------------------------------------------------------------------------------------------------------------------------------------------------------------------------------------------------------------------------------------------------------------------|------------------------------------------------------------|--------|-----------------|
| Protein ID                                                        | Protein names                                                                                                                                                                                                                                                                                                                                            | Gene names                                                 | Score  | LFQ intensity C |
| 06733                                                             | Alpha-enolase                                                                                                                                                                                                                                                                                                                                            | ENO1                                                       | 271.41 | 24327000000     |
| Q16777, Q6FI13                                                    | Histone H2A type 2-C; Histone H2A type 2-A                                                                                                                                                                                                                                                                                                               | HIST2H2AC;<br>HIST2H2AA3                                   | 24.569 | 24322000000     |
| P00338, Q6ZMR3,<br>Q9BYZ2                                         | L-lactate dehydrogenase A chain                                                                                                                                                                                                                                                                                                                          | LDHA                                                       | 234.63 | 24277000000     |
| P04075                                                            | Fructose-bisphosphate aldolase A                                                                                                                                                                                                                                                                                                                         | ALDOA                                                      | 226.23 | 23953000000     |
| Q9Y623                                                            | Myosin-4                                                                                                                                                                                                                                                                                                                                                 | MYH4                                                       | 114.66 | 22597000000     |
| P11021, REV_Q9NXD2                                                | 78 kDa glucose-regulated protein                                                                                                                                                                                                                                                                                                                         | HSPA5                                                      | 283.68 | 21905000000     |
| P09874                                                            | Poly [ADP-ribose] polymerase 1                                                                                                                                                                                                                                                                                                                           | PARP1                                                      | 323.31 | 20800000000     |
| P68363, A6NHL2, Q9H853                                            | Tubulin alpha-1B chain                                                                                                                                                                                                                                                                                                                                   | TUBA1B                                                     | 260.23 | 20404000000     |
| Q07955                                                            | Serine/arginine-rich splicing factor 1                                                                                                                                                                                                                                                                                                                   | SRSF1                                                      | 100.4  | 18528000000     |
| P07437, A6NNZ2, Q9H4B7                                            | Tubulin beta chain                                                                                                                                                                                                                                                                                                                                       | TUBB                                                       | 238.21 | 16738000000     |
| P10809                                                            | 60 kDa heat shock protein, mitochondrial                                                                                                                                                                                                                                                                                                                 | HSPD1                                                      | 311.28 | 16212000000     |
| P07900, Q14568, Q58FG0,<br>Q58FG1                                 | Heat shock protein HSP 90-alpha                                                                                                                                                                                                                                                                                                                          | HSP90AA1                                                   | 229.91 | 15422000000     |
| Q9UKX2                                                            | Myosin-2                                                                                                                                                                                                                                                                                                                                                 | MYH2                                                       | 70.53  | 14554000000     |
| P11387, Q969P6                                                    | DNA topoisomerase 1                                                                                                                                                                                                                                                                                                                                      | TOP1                                                       | 213.05 | 14121000000     |
| P07355, A6NMY6                                                    | Annexin A2; Putative annexin A2-like protein                                                                                                                                                                                                                                                                                                             | ANXA2;<br>ANXA2P2                                          | 248.59 | 13625000000     |
| P06753, REV_Q5T655,<br>Q8ND24                                     | Tropomyosin alpha-3 chain                                                                                                                                                                                                                                                                                                                                | TPM3                                                       | 187.76 | 13616000000     |
| P12883                                                            | Myosin-7                                                                                                                                                                                                                                                                                                                                                 | MYH7                                                       | 162.4  | 11929000000     |
| P22626                                                            | Heterogeneous nuclear ribonucleoproteins A2/B1                                                                                                                                                                                                                                                                                                           | HNRNPA2B1                                                  | 188.97 | 11305000000     |
| Q06830                                                            | Peroxiredoxin-1                                                                                                                                                                                                                                                                                                                                          | PRDX1                                                      | 118.11 | 10291000000     |
| P07910, P0DMR1, O60812,<br>B7ZW38, B2RXH8                         | Heterogeneous nuclear ribonucleoproteins C1/C2;<br>Heterogeneous nuclear ribonucleoprotein C-like 4;<br>Heterogeneous nuclear ribonucleoprotein C-like 1;<br>Heterogeneous nuclear ribonucleoprotein C-like 3;<br>Heterogeneous nuclear ribonucleoprotein C-like 2                                                                                       | HNRNPC;<br>HNRNPCL4;<br>HNRNPCL1;<br>HNRNPCL3;<br>HNRNPCL2 | 102.76 | 10180000000     |
| P0DMV9, P0DMV8                                                    | Heat shock 70 kDa protein 1B; Heat shock 70 kDa<br>protein 1A                                                                                                                                                                                                                                                                                            | HSPA1B;<br>HSPA1A                                          | 221.44 | 10023000000     |
| P06748                                                            | Nucleophosmin                                                                                                                                                                                                                                                                                                                                            | NPM1                                                       | 109.76 | 95259000000     |
| P09651, Q32P51                                                    | Heterogeneous nuclear ribonucleoprotein A1;<br>Heterogeneous nuclear ribonucleoprotein A1,<br>N-terminally processed; Heterogeneous nuclear<br>ribonucleoprotein A1-like 2                                                                                                                                                                               | HNRNPA1;<br>HNRNPA1L2                                      | 144.17 | 93531000000     |
| P19338                                                            | Nucleolin                                                                                                                                                                                                                                                                                                                                                | NCL                                                        | 264.73 | 91590000000     |
| P63104, REV_P53355                                                | 14-3-3 protein zeta/delta                                                                                                                                                                                                                                                                                                                                | YWHAZ                                                      | 106.28 | 90150000000     |
| P06576                                                            | ATP synthase subunit beta, mitochondrial                                                                                                                                                                                                                                                                                                                 | ATP5B                                                      | 274.53 | 88267000000     |
| P07195                                                            | L-lactate dehydrogenase B chain                                                                                                                                                                                                                                                                                                                          | LDHB                                                       | 105.65 | 88225000000     |
| P49327                                                            | Fatty acid synthase; [Acyl-carrier-protein]<br>S-acetyltransferase; [Acyl-carrier-protein]<br>S-malonyltransferase; 3-oxoacyl-[acyl-carrier-protein]<br>synthase; 3-oxoacyl-[acyl-carrier-protein] reductase;<br>3-hydroxyacyl-[acyl-carrier-protein] dehydratase;<br>Enoyl-[acyl-carrier-protein] reductase;<br>Oleoyl-[acyl-carrier-protein] hydrolase | FASN                                                       | 323.31 | 86654000000     |
| P38919                                                            | Eukaryotic initiation factor 4A-III;<br>Eukaryotic initiation factor 4A-III, N-terminally<br>processed                                                                                                                                                                                                                                                   | EIF4A3                                                     | 170.52 | 86259000000     |
| Q9UQ35                                                            | Serine/arginine repetitive matrix protein 2                                                                                                                                                                                                                                                                                                              | SRRM2                                                      | 294.08 | 86237000000     |
| P12268, P20839                                                    | Inosine-5-monophosphate dehydrogenase 2                                                                                                                                                                                                                                                                                                                  | IMPDH2                                                     | 184.86 | 82423000000     |

Table SI. Continued.

| C, Proteins identified from both the control and treatment groups              |                                                                                                                                 |                |        |                 |
|--------------------------------------------------------------------------------|---------------------------------------------------------------------------------------------------------------------------------|----------------|--------|-----------------|
| Protein ID                                                                     | Protein names                                                                                                                   | Gene names     | Score  | LFQ intensity C |
| P62937, P0DN26, A0A0B4J2A2, A0A075B759, Q9Y536, F5H284, P0DN37, O43447, P30405 | Peptidyl-prolyl cis-trans isomerase A; Peptidyl-prolyl cis-trans isomerase A, N-terminally processed                            | PPIA           | 103.22 | 8232700000      |
| P02545                                                                         | Prelamin-A/C; Lamin-A/C                                                                                                         | LMNA           | 260.15 | 7919400000      |
| Q86YZ3                                                                         | Hornerin                                                                                                                        | HRNR           | 323.31 | 7689700000      |
| P62258                                                                         | 14-3-3 protein epsilon                                                                                                          | YWHAE          | 125.76 | 7560800000      |
| Q13247                                                                         | Serine/arginine-rich splicing factor 6                                                                                          | SRSF6          | 71.325 | 7152600000      |
| P18669, P15259, Q8N0Y7                                                         | Phosphoglycerate mutase 1                                                                                                       | PGAM1          | 124.99 | 7124800000      |
| P06744                                                                         | Glucose-6-phosphate isomerase                                                                                                   | GPI            | 167.37 | 6971900000      |
| P09211                                                                         | Glutathione S-transferase P                                                                                                     | GSTP1          | 86.338 | 6812900000      |
| O75367                                                                         | Core histone macro-H2A.1                                                                                                        | H2AFY          | 107.23 | 6682200000      |
| P60174                                                                         | Triosephosphate isomerase                                                                                                       | TPI1           | 125.85 | 6603300000      |
| P15311                                                                         | Ezrin                                                                                                                           | EZR            | 153.44 | 6553500000      |
| Q00610, P53675                                                                 | Clathrin heavy chain 1                                                                                                          | CLTC           | 323.31 | 6518800000      |
| P05976                                                                         | Myosin light chain 1/3, skeletal muscle isoform                                                                                 | MYL1           | 38.655 | 6434700000      |
| Q02952                                                                         | A-kinase anchor protein 12                                                                                                      | AKAP12         | 323.31 | 6379700000      |
| O43707, Q9H254                                                                 | Alpha-actinin-4                                                                                                                 | ACTN4          | 252.59 | 6080200000      |
| Q00839                                                                         | Heterogeneous nuclear ribonucleoprotein U                                                                                       | HNRNPU         | 173.41 | 6049900000      |
| P00558, P07205                                                                 | Phosphoglycerate kinase 1                                                                                                       | PGK1           | 166.1  | 5937300000      |
| Q14676                                                                         | Mediator of DNA damage checkpoint protein 1                                                                                     | MDC1           | 220.7  | 5922100000      |
| P78371                                                                         | T-complex protein 1 subunit beta                                                                                                | CCT2           | 290.64 | 5906600000      |
| P26641                                                                         | Elongation factor 1-gamma                                                                                                       | EEFIG          | 135.84 | 5816000000      |
| P04083                                                                         | Annexin A1                                                                                                                      | ANXA1          | 143.87 | 5647700000      |
| P15531                                                                         | Nucleoside diphosphate kinase A                                                                                                 | NME1           | 69.699 | 5562700000      |
| P84090                                                                         | Enhancer of rudimentary homolog                                                                                                 | ERH            | 35.889 | 5284400000      |
| P61978                                                                         | Heterogeneous nuclear ribonucleoprotein K                                                                                       | HNRNPK         | 127.73 | 5142900000      |
| P62701, P22090, Q8TD47                                                         | 40S ribosomal protein S4, X isoform                                                                                             | RPS4X          | 129.44 | 5107200000      |
| P49368                                                                         | T-complex protein 1 subunit gamma                                                                                               | CCT3           | 197.52 | 4953000000      |
| Q96A32                                                                         | Myosin regulatory light chain 2, skeletal muscle isoform                                                                        | MYLPF          | 16.577 | 4850600000      |
| P62826                                                                         | GTP-binding nuclear protein Ran                                                                                                 | RAN            | 77.921 | 4825400000      |
| Q13464;O75116;Q2HXU8; O94964                                                   | Rho-associated protein kinase 1                                                                                                 | ROCK1          | 323.31 | 4802400000      |
| P25705;REV__Q9Y5A7; REV__O00522                                                | ATP synthase subunit alpha, mitochondrial                                                                                       | ATP5A1         | 196.72 | 4757600000      |
| Q8IUE6;REV__Q8NB25                                                             | Histone H2A type 2-B                                                                                                            | HIST2H2AB      | 12.052 | 4753600000      |
| P23526                                                                         | Adenosylhomocysteinase                                                                                                          | AHCY           | 109.29 | 4696900000      |
| Q12906;Q96SI9                                                                  | Interleukin enhancer-binding factor 3                                                                                           | ILF3           | 165.9  | 4657000000      |
| P39019                                                                         | 40S ribosomal protein S19                                                                                                       | RPS19          | 92.87  | 4386400000      |
| P50990                                                                         | T-complex protein 1 subunit theta                                                                                               | CCT8           | 195.76 | 4364500000      |
| P61247                                                                         | 40S ribosomal protein S3a                                                                                                       | RPS3A          | 117.25 | 4362200000      |
| P14625;Q58FF3                                                                  | Endoplasmic                                                                                                                     | HSP90B1        | 172.79 | 4291100000      |
| P67809;Q9Y2T7                                                                  | Nuclease-sensitive element-binding protein 1                                                                                    | YBX1           | 108.52 | 4282100000      |
| P60842;Q14240                                                                  | Eukaryotic initiation factor 4A-I;Eukaryotic initiation factor 4A-II;Eukaryotic initiation factor 4A-II, N-terminally processed | EIF4A1; EIF4A2 | 134.33 | 4211600000      |
| P09429;B2RPK0;P23497                                                           | High mobility group protein B1;Putative high mobility group protein B1-like 1                                                   | HMGB1; HMGB1P1 | 65.406 | 4181700000      |
| P23246                                                                         | Splicing factor, proline- and glutamine-rich                                                                                    | SFPQ           | 197.59 | 4166400000      |
| P07237                                                                         | Protein disulfide-isomerase                                                                                                     | P4HB           | 188.2  | 3947200000      |
| P51991                                                                         | Heterogeneous nuclear ribonucleoprotein A3                                                                                      | HNRNPA3        | 78.859 | 3884500000      |
| O60506                                                                         | Heterogeneous nuclear ribonucleoprotein Q                                                                                       | SYNCRIP        | 139.58 | 3882500000      |

Table SI. Continued.

C, Proteins identified from both the control and treatment groups

| Protein ID                                                           | Protein names                                                                                                                                                | Gene names        | Score  | LFQ intensity C |
|----------------------------------------------------------------------|--------------------------------------------------------------------------------------------------------------------------------------------------------------|-------------------|--------|-----------------|
| P62851                                                               | 40S ribosomal protein S25                                                                                                                                    | RPS25             | 36.16  | 3847500000      |
| P29401                                                               | Transketolase                                                                                                                                                | TKT               | 186.65 | 3820300000      |
| P29692                                                               | Elongation factor 1-delta                                                                                                                                    | EEF1D             | 104.47 | 3807000000      |
| Q9Y5B9                                                               | FACT complex subunit SPT16                                                                                                                                   | SUPT16H           | 149.81 | 3786300000      |
| P17844                                                               | Probable ATP-dependent RNA helicase DDX5                                                                                                                     | DDX5              | 185.94 | 3779800000      |
| P17066;P48741                                                        | Heat shock 70 kDa protein 6;Putative heat shock 70 kDa protein 7                                                                                             | HSPA6;<br>HSPA7   | 7.4039 | 3770400000      |
| P11940;Q9H361;Q4VXU2;<br>Q96DU9                                      | Polyadenylate-binding protein 1                                                                                                                              | PABPC1            | 172.13 | 3675500000      |
| Q86V81                                                               | THO complex subunit 4                                                                                                                                        | ALYREF            | 81.648 | 3638600000      |
| Q15233;REV__Q9Y2L8;<br>REV__Q86SQ0;<br>REV__A7E2Y1;Q8WXF1;<br>Q6Y7W6 | Non-POU domain-containing octamer-binding protein                                                                                                            | NONO              | 90.296 | 3559800000      |
| Q02878                                                               | 60S ribosomal protein L6                                                                                                                                     | RPL6              | 107.76 | 3537900000      |
| P23528;Q9Y281                                                        | Cofilin-1                                                                                                                                                    | CFL1              | 71.945 | 3488500000      |
| P68371                                                               | Tubulin beta-4B chain                                                                                                                                        | TUBB4B            | 51.164 | 3455200000      |
| P15880                                                               | 40S ribosomal protein S2                                                                                                                                     | RPS2              | 75.098 | 3425900000      |
| P05388;Q8NHW5                                                        | 60S acidic ribosomal protein P0;60S acidic ribosomal protein P0-like                                                                                         | RPLP0;<br>RPLP0P6 | 81.375 | 3405500000      |
| Q05639                                                               | Elongation factor 1-alpha 2                                                                                                                                  | EEF1A2            | 87.416 | 3403700000      |
| P62906                                                               | 60S ribosomal protein L10a                                                                                                                                   | RPL10A            | 62.242 | 3312200000      |
| P39023                                                               | 60S ribosomal protein L3                                                                                                                                     | RPL3              | 97.279 | 3242100000      |
| Q16531                                                               | DNA damage-binding protein 1                                                                                                                                 | DDB1              | 191.89 | 3198500000      |
| P23396                                                               | 40S ribosomal protein S3                                                                                                                                     | RPS3              | 112.73 | 3183000000      |
| P11217                                                               | Glycogen phosphorylase, muscle form                                                                                                                          | PYGM              | 87.426 | 3070600000      |
| P30050                                                               | 60S ribosomal protein L12                                                                                                                                    | RPL12             | 64.105 | 3021700000      |
| P62424                                                               | 60S ribosomal protein L7a                                                                                                                                    | RPL7A             | 123.38 | 2979400000      |
| P52272                                                               | Heterogeneous nuclear ribonucleoprotein M                                                                                                                    | HNRNPM            | 212.1  | 2967700000      |
| P02765                                                               | Alpha-2-HS-glycoprotein;Alpha-2-HS-glycoprotein chain A;Alpha-2-HS-glycoprotein chain B                                                                      | AHSG              | 29.398 | 2913800000      |
| P40227;Q92526                                                        | T-complex protein 1 subunit zeta                                                                                                                             | CCT6A             | 104.13 | 2901600000      |
| P38159;Q96E39;O75526;<br>Q8IZ40;Q8N7X1                               | RNA-binding motif protein, X chromosome;<br>RNA-binding motif protein, X chromosome,<br>N-terminally processed;RNA binding motif protein,<br>X-linked-like-1 | RBMX;<br>RBMXL1   | 70.967 | 2901300000      |
| P62277                                                               | 40S ribosomal protein S13                                                                                                                                    | RPS13             | 55.704 | 2821600000      |
| P22234                                                               | Multifunctional protein ADE2;<br>Phosphoribosylaminoimidazole-succinocarboxamide synthase;Phosphoribosylaminoimidazole carboxylase                           | PAICS             | 143.63 | 2792200000      |
| P62081                                                               | 40S ribosomal protein S7                                                                                                                                     | RPS7              | 72.201 | 2774200000      |
| P60866                                                               | 40S ribosomal protein S20                                                                                                                                    | RPS20             | 31.703 | 2763400000      |
| P42704                                                               | Leucine-rich PPR motif-containing protein, mitochondrial                                                                                                     | LRPPRC            | 267.6  | 2736900000      |
| P35609                                                               | Alpha-actinin-2                                                                                                                                              | ACTN2             | 139.31 | 2719100000      |
| P62269                                                               | 40S ribosomal protein S18                                                                                                                                    | RPS18             | 63.656 | 2707700000      |
| P46782                                                               | 40S ribosomal protein S5;40S ribosomal protein S5, N-terminally processed                                                                                    | RPS5              | 74.985 | 2693400000      |
| P62888                                                               | 60S ribosomal protein L30                                                                                                                                    | RPL30             | 62.583 | 2673500000      |
| P17987                                                               | T-complex protein 1 subunit alpha                                                                                                                            | TCP1              | 127.71 | 2664500000      |
| Q8NC51                                                               | Plasminogen activator inhibitor 1 RNA-binding protein                                                                                                        | SERBP1            | 87.381 | 2656900000      |
| Q08945                                                               | FACT complex subunit SSRP1                                                                                                                                   | SSRP1             | 103.71 | 2646300000      |

Table SI. Continued.

| C, Proteins identified from both the control and treatment groups |                                                                                                                                                 |            |        |                 |
|-------------------------------------------------------------------|-------------------------------------------------------------------------------------------------------------------------------------------------|------------|--------|-----------------|
| Protein ID                                                        | Protein names                                                                                                                                   | Gene names | Score  | LFQ intensity C |
| P31948                                                            | Stress-induced-phosphoprotein 1                                                                                                                 | STIP1      | 126.74 | 2640400000      |
| P63241;Q9GZV4;Q6IS14                                              | Eukaryotic translation initiation factor 5A-1                                                                                                   | EIF5A      | 87.742 | 2638700000      |
| P22061                                                            | Protein-L-isoaspartate(D-aspartate)<br>O-methyltransferase                                                                                      | PCMT1      | 98.271 | 2635400000      |
| Q5T749                                                            | Keratinocyte proline-rich protein                                                                                                               | KPRP       | 148.32 | 2630900000      |
| P46781                                                            | 40S ribosomal protein S9                                                                                                                        | RPS9       | 85.968 | 2576100000      |
| P14866;Q8WVV9                                                     | Heterogeneous nuclear ribonucleoprotein L                                                                                                       | HNRNPL     | 101.13 | 2479400000      |
| P08865                                                            | 40S ribosomal protein SA                                                                                                                        | RPSA       | 111.34 | 2409400000      |
| Q01130;Q9BRL6                                                     | Serine/arginine-rich splicing factor 2                                                                                                          | SRSF2      | 37.942 | 2365400000      |
| P16615                                                            | Sarcoplasmic/endoplasmic reticulum calcium<br>ATPase 2                                                                                          | ATP2A2     | 110.25 | 2353100000      |
| P40926                                                            | Malate dehydrogenase, mitochondrial                                                                                                             | MDH2       | 113.28 | 2322700000      |
| P26599;O95758                                                     | Polypyrimidine tract-binding protein 1                                                                                                          | PTBP1      | 120.94 | 2312400000      |
| Q8N257                                                            | Histone H2B type 3-B                                                                                                                            | HIST3H2BB  | 6.1253 | 2310600000      |
| P62995                                                            | Transformer-2 protein homolog beta                                                                                                              | TRA2B      | 46.766 | 2299000000      |
| Q12905                                                            | Interleukin enhancer-binding factor 2                                                                                                           | ILF2       | 58.474 | 2292700000      |
| P48643                                                            | T-complex protein 1 subunit epsilon                                                                                                             | CCT5       | 159.09 | 2278900000      |
| P04792                                                            | Heat shock protein beta-1                                                                                                                       | HSPB1      | 70.512 | 2215500000      |
| Q07020                                                            | 60S ribosomal protein L18                                                                                                                       | RPL18      | 61.412 | 2144400000      |
| Q99832                                                            | T-complex protein 1 subunit eta                                                                                                                 | CCT7       | 120.91 | 2143200000      |
| P02788                                                            | Lactotransferrin;Lactoferricin-H;Kaliocin-1;<br>Lactoferroxin-A;Lactoferroxin-B;Lactoferroxin-C                                                 | LTF        | 136.4  | 2116300000      |
| P63244                                                            | Guanine nucleotide-binding protein subunit<br>beta-2-like 1;Guanine nucleotide-binding protein<br>subunit beta-2-like 1, N-terminally processed | GNB2L1     | 90.803 | 2106000000      |
| O75531                                                            | Barrier-to-autointegration factor;<br>Barrier-to-autointegration factor, N-terminally<br>processed                                              | BANF1      | 25.409 | 2106000000      |
| P35232                                                            | Prohibitin                                                                                                                                      | PHB        | 102.24 | 2077100000      |
| Q9UQ80                                                            | Proliferation-associated protein 2G4                                                                                                            | PA2G4      | 90.334 | 2059700000      |
| Q92598;Q8TDX9                                                     | Heat shock protein 105 kDa                                                                                                                      | HSPH1      | 185.11 | 2037200000      |
| Q13263                                                            | Transcription intermediary factor 1-beta                                                                                                        | TRIM28     | 113.62 | 2015800000      |
| P40925                                                            | Malate dehydrogenase, cytoplasmic                                                                                                               | MDH1       | 79.81  | 2008400000      |
| P12956                                                            | X-ray repair cross-complementing protein 6                                                                                                      | XRCC6      | 148.3  | 2001600000      |
| Q02413                                                            | Desmoglein-1                                                                                                                                    | DSG1       | 93.711 | 1995100000      |
| P05141;Q9H0C2                                                     | ADP/ATP translocase 2;ADP/ATP translocase 2,<br>N-terminally processed                                                                          | SLC25A5    | 90.215 | 1989800000      |
| P36578                                                            | 60S ribosomal protein L4                                                                                                                        | RPL4       | 96.848 | 1980800000      |
| P84098                                                            | 60S ribosomal protein L19                                                                                                                       | RPL19      | 33.312 | 1974000000      |
| P07305                                                            | Histone H1.0;Histone H1.0, N-terminally processed                                                                                               | H1FO       | 20.94  | 1967700000      |
| P61313                                                            | 60S ribosomal protein L15                                                                                                                       | RPL15      | 73.482 | 1966700000      |
| P08708                                                            | 40S ribosomal protein S17                                                                                                                       | RPS17      | 41.694 | 1941400000      |
| P62917                                                            | 60S ribosomal protein L8                                                                                                                        | RPL8       | 55.953 | 1937100000      |
| P07737                                                            | Profilin-1                                                                                                                                      | PFN1       | 48.557 | 1936300000      |
| P05387                                                            | 60S acidic ribosomal protein P2                                                                                                                 | RPLP2      | 46.034 | 1907500000      |
| P27797                                                            | Calreticulin                                                                                                                                    | CALR       | 87.561 | 1894100000      |
| P26373                                                            | 60S ribosomal protein L13                                                                                                                       | RPL13      | 48.712 | 1866100000      |
| P34932                                                            | Heat shock 70 kDa protein 4                                                                                                                     | HSPA4      | 176.01 | 1850300000      |
| P62750                                                            | 60S ribosomal protein L23a                                                                                                                      | RPL23A     | 64.368 | 1846000000      |
| P21333                                                            | Filamin-A                                                                                                                                       | FLNA       | 209.67 | 1845000000      |
| P42766                                                            | 60S ribosomal protein L35                                                                                                                       | RPL35      | 35.723 | 1840700000      |
| P21796                                                            | Voltage-dependent anion-selective channel protein 1                                                                                             | VDAC1      | 86.394 | 1835000000      |
| P35268                                                            | 60S ribosomal protein L22                                                                                                                       | RPL22      | 24.127 | 1805500000      |
| P18124;Q9Y4A5                                                     | 60S ribosomal protein L7                                                                                                                        | RPL7       | 85.265 | 1750200000      |

Table SI. Continued.

C, Proteins identified from both the control and treatment groups

| Protein ID           | Protein names                                                                                                                   | Gene names        | Score  | LFQ intensity C |
|----------------------|---------------------------------------------------------------------------------------------------------------------------------|-------------------|--------|-----------------|
| P30153;P30154        | Serine/threonine-protein phosphatase 2A 65 kDa regulatory subunit A alpha isoform                                               | PPP2R1A           | 123.44 | 1740900000      |
| O75475               | PC4 and SFRS1-interacting protein                                                                                               | PSIP1             | 55.619 | 1739500000      |
| P13010               | X-ray repair cross-complementing protein 5                                                                                      | XRCC5             | 199.34 | 1736500000      |
| P30101               | Protein disulfide-isomerase A3                                                                                                  | PDIA3             | 176.45 | 1716800000      |
| P50914               | 60S ribosomal protein L14                                                                                                       | RPL14             | 40.66  | 1703100000      |
| O43390               | Heterogeneous nuclear ribonucleoprotein R                                                                                       | HNRNPR            | 76.299 | 1661500000      |
| P55072               | Transitional endoplasmic reticulum ATPase                                                                                       | VCP               | 150.33 | 1659000000      |
| Q08211               | ATP-dependent RNA helicase A                                                                                                    | DHX9              | 196.6  | 1653700000      |
| Q14103               | Heterogeneous nuclear ribonucleoprotein D0                                                                                      | HNRNPD            | 75.461 | 1562800000      |
| P05109               | Protein S100-A8;Protein S100-A8, N-terminally processed                                                                         | S100A8            | 26.736 | 1554800000      |
| P49411               | Elongation factor Tu, mitochondrial                                                                                             | TUFM              | 99.584 | 1552400000      |
| P62318               | Small nuclear ribonucleoprotein Sm D3                                                                                           | SNRPD3            | 29.113 | 1544200000      |
| Q14974               | Importin subunit beta-1                                                                                                         | KPNB1             | 159.79 | 1536300000      |
| P02786               | Transferrin receptor protein 1;Transferrin receptor protein 1, serum form                                                       | TFRC              | 131.46 | 1534000000      |
| O43169               | Cytochrome b5 type B                                                                                                            | CYB5B             | 43.996 | 1518600000      |
| P35637               | RNA-binding protein FUS                                                                                                         | FUS               | 43.925 | 1515900000      |
| P46777               | 60S ribosomal protein L5                                                                                                        | RPL5              | 63.645 | 1494100000      |
| Q96HC4               | PDZ and LIM domain protein 5                                                                                                    | PDLIM5            | 100.4  | 1488300000      |
| P40429;Q6NVV1        | 60S ribosomal protein L13a                                                                                                      | RPL13A            | 56.768 | 1469100000      |
| P55209               | Nucleosome assembly protein 1-like 1                                                                                            | NAP1L1            | 39.273 | 1454900000      |
| P23284               | Peptidyl-prolyl cis-trans isomerase B                                                                                           | PIPB              | 62.682 | 1444500000      |
| P31946               | 14-3-3 protein beta/alpha;14-3-3 protein beta/alpha, N-terminally processed                                                     | YWHAB             | 64.736 | 1438000000      |
| P15924               | Desmoplakin                                                                                                                     | DSP               | 127.93 | 1429000000      |
| Q99623               | Prohibitin-2                                                                                                                    | PHB2              | 103.63 | 1428300000      |
| P09382               | Galectin-1                                                                                                                      | LGALS1            | 62.72  | 1423300000      |
| P34897;P34896        | Serine hydroxymethyltransferase, mitochondrial                                                                                  | SHMT2             | 114.58 | 1400500000      |
| Q96AG4               | Leucine-rich repeat-containing protein 59                                                                                       | LRRC59            | 66.613 | 1388100000      |
| P04843               | Dolichyl-diphosphooligosaccharide-protein glycosyltransferase subunit 1                                                         | RPN1              | 173.9  | 1387700000      |
| P27824;O14967        | Calnexin                                                                                                                        | CANX              | 87.081 | 1387400000      |
| P08758               | Annexin A5                                                                                                                      | ANXA5             | 96.834 | 1359800000      |
| P0DOX7;P01834        | Ig kappa chain C region                                                                                                         | IGKC              | 14.019 | 1321400000      |
| P22314               | Ubiquitin-like modifier-activating enzyme 1                                                                                     | UBA1              | 145.81 | 1316500000      |
| P06702               | Protein S100-A9                                                                                                                 | S100A9            | 41.664 | 1311800000      |
| Q13200               | 26S proteasome non-ATPase regulatory subunit 2                                                                                  | PSMD2             | 112.11 | 1308500000      |
| P78527               | DNA-dependent protein kinase catalytic subunit                                                                                  | PRKDC             | 229.26 | 1307100000      |
| O00299               | Chloride intracellular channel protein 1                                                                                        | CLIC1             | 63.277 | 1296300000      |
| P35613               | Basigin                                                                                                                         | BSG               | 45.435 | 1294600000      |
| P60228               | Eukaryotic translation initiation factor 3 subunit E                                                                            | EIF3E             | 98.864 | 1289300000      |
| P01876               | Ig alpha-1 chain C region                                                                                                       | IGHA1             | 60.239 | 1278700000      |
| Q14152               | Eukaryotic translation initiation factor 3 subunit A                                                                            | EIF3A             | 185.15 | 1270700000      |
| Q13765;E9PAV3;Q9BZK3 | Nascent polypeptide-associated complex subunit alpha;Nascent polypeptide-associated complex subunit alpha, muscle-specific form | NACA              | 44.141 | 1269200000      |
| P26640               | Valine-tRNA ligase                                                                                                              | VAR5              | 149.12 | 1269200000      |
| Q01518               | Adenylyl cyclase-associated protein 1                                                                                           | CAP1              | 99.038 | 1263600000      |
| P46783;Q9NQ39        | 40S ribosomal protein S10;Putative 40S ribosomal protein S10-like                                                               | RPS10;<br>RPS10P5 | 47.799 | 1246500000      |
| P61353               | 60S ribosomal protein L27                                                                                                       | RPL27             | 35.494 | 1236300000      |
| P32969               | 60S ribosomal protein L9                                                                                                        | RPL9              | 68.251 | 1232500000      |



Table SI. Continued.

C, Proteins identified from both the control and treatment groups

| Protein ID                                               | Protein names                                                                                                                                                                       | Gene names             | Score  | LFQ intensity C |
|----------------------------------------------------------|-------------------------------------------------------------------------------------------------------------------------------------------------------------------------------------|------------------------|--------|-----------------|
| Q13283                                                   | Ras GTPase-activating protein-binding protein 1                                                                                                                                     | G3BP1                  | 88.365 | 1209300000      |
| P18206                                                   | Vinculin                                                                                                                                                                            | VCL                    | 117.75 | 1194500000      |
| O75533                                                   | Splicing factor 3B subunit 1                                                                                                                                                        | SF3B1                  | 114.58 | 1194400000      |
| P18621                                                   | 60S ribosomal protein L17                                                                                                                                                           | RPL17                  | 48.801 | 1167800000      |
| P27635;Q96L21                                            | 60S ribosomal protein L10;60S ribosomal protein L10-like                                                                                                                            | RPL10;<br>RPL10L       | 56.386 | 1165500000      |
| O00571;O15523;Q9NQI0                                     | ATP-dependent RNA helicase DDX3X;<br>ATP-dependent RNA helicase DDX3Y                                                                                                               | DDX3X;<br>DDX3Y        | 112.77 | 1163900000      |
| Q16658                                                   | Fascin                                                                                                                                                                              | FSCN1                  | 70.113 | 1157000000      |
| P09972                                                   | Fructose-bisphosphate aldolase C                                                                                                                                                    | ALDOC                  | 56.754 | 1156000000      |
| P36551                                                   | Oxygen-dependent coproporphyrinogen-III oxidase, mitochondrial                                                                                                                      | CPOX                   | 101.51 | 1146200000      |
| P0DP25;P0DP24;P0DP23;<br>P27482;P02585                   | Calmodulin-3                                                                                                                                                                        | CALM3                  | 26.263 | 1136500000      |
| P50395;P31150                                            | Rab GDP dissociation inhibitor beta;Rab GDP dissociation inhibitor alpha                                                                                                            | GDI2;GDI1              | 56.583 | 1128000000      |
| P84103                                                   | Serine/arginine-rich splicing factor 3                                                                                                                                              | SRSF3                  | 19.31  | 1114400000      |
| P62241                                                   | 40S ribosomal protein S8                                                                                                                                                            | RPS8                   | 62.457 | 1095000000      |
| P31943;P55795                                            | Heterogeneous nuclear ribonucleoprotein H;<br>Heterogeneous nuclear ribonucleoprotein H,<br>N-terminally processed                                                                  | HNRNPH1                | 57.515 | 1094200000      |
| P62820;Q9H0U4;Q92928;<br>P51153;Q92930;P61006;<br>P59190 | Ras-related protein Rab-1A;Ras-related protein Rab-1B                                                                                                                               | RAB1A;<br>RAB1B        | 58.51  | 1094100000      |
| Q14697                                                   | Neutral alpha-glucosidase AB                                                                                                                                                        | GANAB                  | 121.5  | 1086900000      |
| P30048                                                   | Thioredoxin-dependent peroxide reductase, mitochondrial                                                                                                                             | PRDX3                  | 33.701 | 1068600000      |
| P53396                                                   | ATP-citrate synthase                                                                                                                                                                | ACLY                   | 120.92 | 1066000000      |
| P12004                                                   | Proliferating cell nuclear antigen                                                                                                                                                  | PCNA                   | 55.865 | 1060300000      |
| O14818;Q8TAA3                                            | Proteasome subunit alpha type-7;Proteasome subunit alpha type-7-like                                                                                                                | PSMA7;<br>PSMA8        | 45.21  | 1058500000      |
| P62910                                                   | 60S ribosomal protein L32                                                                                                                                                           | RPL32                  | 35.834 | 1055800000      |
| O60664                                                   | Perilipin-3                                                                                                                                                                         | PLIN3                  | 61.213 | 1040300000      |
| P50502;Q8IZP2;Q8NFI4                                     | Hsc70-interacting protein;Putative protein FAM10A4;Putative protein FAM10A5                                                                                                         | ST13;ST13P4;<br>ST13P5 | 60.651 | 1029400000      |
| P61254;Q9UNX3                                            | 60S ribosomal protein L26;60S ribosomal protein L26-like 1                                                                                                                          | RPL26;<br>RPL26L1      | 31.927 | 1021600000      |
| Q6P5R6                                                   | 60S ribosomal protein L22-like 1                                                                                                                                                    | RPL22L1                | 22.098 | 1016300000      |
| P62249                                                   | 40S ribosomal protein S16                                                                                                                                                           | RPS16                  | 46.656 | 1013400000      |
| Q99613;B5ME19                                            | Eukaryotic translation initiation factor 3 subunit C;<br>Eukaryotic translation initiation factor 3 subunit C-like protein                                                          | EIF3C;<br>EIF3CL       | 116.1  | 1012300000      |
| Q9NQ3                                                    | Reticulon-4                                                                                                                                                                         | RTN4                   | 52.153 | 1004500000      |
| P12277                                                   | Creatine kinase B-type                                                                                                                                                              | CKB                    | 88.033 | 1001200000      |
| P13667                                                   | Protein disulfide-isomerase A4                                                                                                                                                      | PDIA4                  | 80.008 | 987510000       |
| Q15717                                                   | ELAV-like protein 1                                                                                                                                                                 | ELAVL1                 | 62.674 | 983610000       |
| P18754                                                   | Regulator of chromosome condensation                                                                                                                                                | RCC1                   | 60.997 | 977860000       |
| P22102                                                   | Trifunctional purine biosynthetic protein adenosine-3;Phosphoribosylamine-glycine ligase; Phosphoribosylformylglycinamide cyclo-ligase; Phosphoribosylglycinamide formyltransferase | GART                   | 112.61 | 967340000       |
| Q15181                                                   | Inorganic pyrophosphatase                                                                                                                                                           | PPA1                   | 63.077 | 957070000       |
| Q04637;O43432;<br>REV__Q8NEG2                            | Eukaryotic translation initiation factor 4 gamma 1                                                                                                                                  | EIF4G1                 | 120.41 | 954800000       |

Table SI. Continued.

| C, Proteins identified from both the control and treatment groups |                                                                                                                                                                |                              |        |                 |
|-------------------------------------------------------------------|----------------------------------------------------------------------------------------------------------------------------------------------------------------|------------------------------|--------|-----------------|
| Protein ID                                                        | Protein names                                                                                                                                                  | Gene names                   | Score  | LFQ intensity C |
| Q07021                                                            | Complement component 1 Q subcomponent-binding protein, mitochondrial                                                                                           | C1QBP                        | 34.528 | 953740000       |
| P31947                                                            | 14-3-3 protein sigma                                                                                                                                           | SFN                          | 77.841 | 952980000       |
| Q9Y265                                                            | RuvB-like 1                                                                                                                                                    | RUVBL1                       | 89.131 | 948410000       |
| P62854;Q5JNZ5                                                     | 40S ribosomal protein S26;Putative 40S ribosomal protein S26-like 1                                                                                            | RPS26;<br>RPS26P11           | 25.007 | 941400000       |
| P55786;A6NEC2                                                     | Puromycin-sensitive aminopeptidase                                                                                                                             | NPEPPS                       | 103.45 | 931550000       |
| P22695                                                            | Cytochrome b-c1 complex subunit 2, mitochondrial                                                                                                               | UQCRC2                       | 70.649 | 931050000       |
| P04844                                                            | Dolichyl-diphosphooligosaccharide-protein glycosyltransferase subunit 2                                                                                        | RPN2                         | 78.721 | 930940000       |
| P12273                                                            | Prolactin-inducible protein                                                                                                                                    | PIP                          | 51.229 | 928040000       |
| Q13126                                                            | S-methyl-5-thioadenosine phosphorylase                                                                                                                         | MTAP                         | 74.755 | 927860000       |
| P00505                                                            | Aspartate aminotransferase, mitochondrial                                                                                                                      | GOT2                         | 68.923 | 926570000       |
| Q01469;A8MUU1                                                     | Fatty acid-binding protein, epidermal                                                                                                                          | FABP5                        | 45.547 | 913920000       |
| P62280                                                            | 40S ribosomal protein S11                                                                                                                                      | RPS11                        | 38.267 | 905490000       |
| P62913                                                            | 60S ribosomal protein L11                                                                                                                                      | RPL11                        | 28.019 | 904050000       |
| Q8NEZ5                                                            | F-box only protein 22                                                                                                                                          | FBXO22                       | 67.895 | 895480000       |
| Q01813                                                            | ATP-dependent 6-phosphofructokinase, platelet type                                                                                                             | PFKP                         | 105.04 | 894080000       |
| Q15366;P57721                                                     | Poly(rC)-binding protein 2                                                                                                                                     | PCBP2                        | 50.603 | 878310000       |
| Q02790                                                            | Peptidyl-prolyl cis-trans isomerase FKBP4; Peptidyl-prolyl cis-trans isomerase FKBP4, N-terminally processed                                                   | FKBP4                        | 83.811 | 869130000       |
| Q08554                                                            | Desmocollin-1                                                                                                                                                  | DSC1                         | 35.451 | 865290000       |
| P63162;P14678                                                     | Small nuclear ribonucleoprotein-associated protein N;Small nuclear ribonucleoprotein-associated proteins B and B                                               | SNRPN;<br>SNRNPB             | 26.162 | 865160000       |
| P84077;P61204                                                     | ADP-ribosylation factor 1;ADP-ribosylation factor 3                                                                                                            | ARF1;ARF3                    | 34.892 | 851020000       |
| P25788                                                            | Proteasome subunit alpha type-3                                                                                                                                | PSMA3                        | 48.758 | 849070000       |
| P14923                                                            | Junction plakoglobin                                                                                                                                           | JUP                          | 102.26 | 845730000       |
| P24539                                                            | ATP synthase F(0) complex subunit B1, mitochondrial                                                                                                            | ATP5F1                       | 51.181 | 840630000       |
| P62314                                                            | Small nuclear ribonucleoprotein Sm D1                                                                                                                          | SNRPD1                       | 27.447 | 837730000       |
| P48047                                                            | ATP synthase subunit O, mitochondrial                                                                                                                          | ATP5O                        | 72.356 | 837210000       |
| P25311                                                            | Zinc-alpha-2-glycoprotein                                                                                                                                      | AZGP1                        | 53.86  | 828870000       |
| Q92945                                                            | Far upstream element-binding protein 2                                                                                                                         | KHSRP                        | 86.506 | 828420000       |
| P05023;P13637;P50993;                                             | Sodium/potassium-transporting ATPase subunit alpha-1;Sodium/potassium-transporting ATPase subunit alpha-3;Sodium/potassium-transporting ATPase subunit alpha-2 | ATP1A1;<br>ATP1A3;<br>ATP1A2 | 114.26 | 827530000       |
| Q13733                                                            |                                                                                                                                                                |                              |        |                 |
| Q02543                                                            | 60S ribosomal protein L18a                                                                                                                                     | RPL18A                       | 41.853 | 824000000       |
| P0DOX5;P01857;P01860                                              | Ig gamma-1 chain C region                                                                                                                                      | IGHG1                        | 24.796 | 821130000       |
| P46778                                                            | 60S ribosomal protein L21                                                                                                                                      | RPL21                        | 17.213 | 794450000       |
| P42167;P42166                                                     | Lamina-associated polypeptide 2, isoforms beta/gamma;Thymopoietin;Thymopentin; Lamina-associated polypeptide 2, isoform alpha; Thymopoietin;Thymopentin        | TMPO                         | 63.233 | 793470000       |
| P28066                                                            | Proteasome subunit alpha type-5                                                                                                                                | PSMA5                        | 47.58  | 786360000       |
| Q13435                                                            | Splicing factor 3B subunit 2                                                                                                                                   | SF3B2                        | 52.043 | 780960000       |
| Q9Y490                                                            | Talin-1                                                                                                                                                        | TLN1                         | 78.133 | 780070000       |
| P62244                                                            | 40S ribosomal protein S15a                                                                                                                                     | RPS15A                       | 29.68  | 779850000       |
| P55884                                                            | Eukaryotic translation initiation factor 3 subunit B                                                                                                           | EIF3B                        | 91.217 | 760030000       |
| Q9Y224                                                            | UPF0568 protein C14orf166                                                                                                                                      | C14orf166                    | 66.235 | 759590000       |
| O00231                                                            | 26S proteasome non-ATPase regulatory subunit 11                                                                                                                | PSMD11                       | 66.077 | 758440000       |

Table SI. Continued.

| C, Proteins identified from both the control and treatment groups |                                                                                                                                        |                       |        |                 |
|-------------------------------------------------------------------|----------------------------------------------------------------------------------------------------------------------------------------|-----------------------|--------|-----------------|
| Protein ID                                                        | Protein names                                                                                                                          | Gene names            | Score  | LFQ intensity C |
| Q15459                                                            | Splicing factor 3A subunit 1                                                                                                           | SF3A1                 | 64.931 | 754570000       |
| Q13151                                                            | Heterogeneous nuclear ribonucleoprotein A0                                                                                             | HNRNPA0               | 45.437 | 751930000       |
| P30041                                                            | Peroxiredoxin-6                                                                                                                        | PRDX6                 | 62.003 | 749500000       |
| P62841                                                            | 40S ribosomal protein S15                                                                                                              | RPS15                 | 27.074 | 749260000       |
| P46940;Q86VI3                                                     | Ras GTPase-activating-like protein IQGAP1                                                                                              | IQGAP1                | 123.83 | 747780000       |
| Q9GZZ1                                                            | N-alpha-acetyltransferase 50                                                                                                           | NAA50                 | 73.005 | 744490000       |
| Q09028                                                            | Histone-binding protein RBBP4                                                                                                          | RBBP4                 | 69.081 | 738550000       |
| Q15365;P57723                                                     | Poly(rC)-binding protein 1                                                                                                             | PCBP1                 | 84.312 | 738510000       |
| Q9Y3U8                                                            | 60S ribosomal protein L36                                                                                                              | RPL36                 | 35.767 | 736550000       |
| P16070                                                            | CD44 antigen                                                                                                                           | CD44                  | 19.582 | 732580000       |
| Q9Y262                                                            | Eukaryotic translation initiation factor 3 subunit L                                                                                   | EIF3L                 | 84.773 | 727000000       |
| P41091;Q2VIR3                                                     | Eukaryotic translation initiation factor 2 subunit 3;<br>Putative eukaryotic translation initiation<br>factor 2 subunit 3-like protein | EIF2S3;<br>EIF2S3L    | 75.371 | 726220000       |
| P62140                                                            | Serine/threonine-protein phosphatase PP1-beta<br>catalytic subunit                                                                     | PPP1CB                | 60.78  | 712540000       |
| Q9Y230                                                            | RuvB-like 2                                                                                                                            | RUVBL2                | 64.508 | 708690000       |
| P16989                                                            | Y-box-binding protein 3                                                                                                                | YBX3                  | 48.23  | 706620000       |
| P51665                                                            | 26S proteasome non-ATPase regulatory subunit 7                                                                                         | PSMD7                 | 79.819 | 702920000       |
| P07814                                                            | Bifunctional glutamate/proline-tRNA ligase;<br>Glutamate-tRNA ligase;Proline-tRNA ligase                                               | EPRS                  | 137.61 | 702540000       |
| Q15084                                                            | Protein disulfide-isomerase A6                                                                                                         | PDIA6                 | 68.607 | 698180000       |
| P12429                                                            | Annexin A3                                                                                                                             | ANXA3                 | 80.106 | 695430000       |
| Q9UHD8                                                            | Septin-9                                                                                                                               | SEPT9                 | 45.239 | 693900000       |
| P62753                                                            | 40S ribosomal protein S6                                                                                                               | RPS6                  | 31.988 | 692200000       |
| Q5T750                                                            | Skin-specific protein 32                                                                                                               | XP32                  | 15.261 | 689150000       |
| Q13310                                                            | Polyadenylate-binding protein 4                                                                                                        | PABPC4                | 43.389 | 688050000       |
| P25786                                                            | Proteasome subunit alpha type-1                                                                                                        | PSMA1                 | 65.205 | 660100000       |
| P0DOY3;P0DOY2;<br>P0CG04;P0CF74;B9A064;<br>A0M8Q6                 | Ig lambda-1 chain C regions;Ig lambda-6 chain C<br>region;Immunoglobulin lambda-like polypeptide 5                                     | IGLC1;IGLC6;<br>IGLL5 | 26.623 | 658740000       |
| Q5D862                                                            | Filaggrin-2                                                                                                                            | FLG2                  | 45.29  | 658290000       |
| Q92841                                                            | Probable ATP-dependent RNA helicase DDX17                                                                                              | DDX17                 | 49.939 | 654620000       |
| Q00325                                                            | Phosphate carrier protein, mitochondrial                                                                                               | SLC25A3               | 25.917 | 647330000       |
| Q01105;P0DME0                                                     | Protein SET;Protein SETSIP                                                                                                             | SET;SETSIP            | 29.277 | 645410000       |
| O14980                                                            | Exportin-1                                                                                                                             | XPO1                  | 141.49 | 643540000       |
| P09960                                                            | Leukotriene A-4 hydrolase                                                                                                              | LTA4H                 | 85.328 | 632440000       |
| P31689                                                            | DnaJ homolog subfamily A member 1                                                                                                      | DNAJA1                | 64.064 | 631350000       |
| P60660;P14649                                                     | Myosin light polypeptide 6                                                                                                             | MYL6                  | 36.674 | 628020000       |
| P24534                                                            | Elongation factor 1-beta                                                                                                               | EEF1B2                | 22.438 | 625630000       |
| P56537                                                            | Eukaryotic translation initiation factor 6                                                                                             | EIF6                  | 25.588 | 624310000       |
| Q99729                                                            | Heterogeneous nuclear ribonucleoprotein A/B                                                                                            | HNRNPAB               | 38.33  | 623850000       |
| P26368                                                            | Splicing factor U2AF 65 kDa subunit                                                                                                    | U2AF2                 | 60.221 | 620850000       |
| Q99873;Q9NR22                                                     | Protein arginine N-methyltransferase 1                                                                                                 | PRMT1                 | 51.066 | 613130000       |
| P61981                                                            | 14-3-3 protein gamma;14-3-3 protein gamma,<br>N-terminally processed                                                                   | YWHAG                 | 49.774 | 612830000       |
| P41252                                                            | Isoleucine-tRNA ligase, cytoplasmic                                                                                                    | IARS                  | 133.91 | 612390000       |
| P43243                                                            | Matrin-3                                                                                                                               | MATR3                 | 65.84  | 609240000       |
| Q8WZ42                                                            | Titin                                                                                                                                  | TTN                   | 75.979 | 604080000       |
| Q00796                                                            | Sorbitol dehydrogenase                                                                                                                 | SORD                  | 50.42  | 594880000       |
| O00154                                                            | Cytosolic acyl coenzyme A thioester hydrolase                                                                                          | ACOT7                 | 21.062 | 593650000       |
| O15372                                                            | Eukaryotic translation initiation factor 3 subunit H                                                                                   | EIF3H                 | 61.223 | 590930000       |
| P62847                                                            | 40S ribosomal protein S24                                                                                                              | RPS24                 | 28.589 | 588540000       |
| Q9Y3I0                                                            | tRNA-splicing ligase RtcB homolog                                                                                                      | RTCB                  | 47.712 | 581680000       |
| Q9UN86                                                            | Ras GTPase-activating protein-binding protein 2                                                                                        | G3BP2                 | 42.572 | 577870000       |

Table SI. Continued.

| C, Proteins identified from both the control and treatment groups                 |                                                                                                                                                                                                          |                                                                                                                       |        |                 |
|-----------------------------------------------------------------------------------|----------------------------------------------------------------------------------------------------------------------------------------------------------------------------------------------------------|-----------------------------------------------------------------------------------------------------------------------|--------|-----------------|
| Protein ID                                                                        | Protein names                                                                                                                                                                                            | Gene names                                                                                                            | Score  | LFQ intensity C |
| Q58FF8                                                                            | Putative heat shock protein HSP 90-beta 2                                                                                                                                                                | HSP90AB2P                                                                                                             | 10.274 | 571080000       |
| Q9Y4L1                                                                            | Hypoxia up-regulated protein 1                                                                                                                                                                           | HYOU1                                                                                                                 | 43.668 | 570620000       |
| P0DN76;Q01081;Q8WU68                                                              | Splicing factor U2AF 35 kDa subunit;Splicing factor U2AF 26 kDa subunit                                                                                                                                  | U2AF1;<br>U2AF1L4                                                                                                     | 35.347 | 562680000       |
| O43399                                                                            | Tumor protein D54                                                                                                                                                                                        | TPD52L2                                                                                                               | 40.496 | 561570000       |
| Q14444                                                                            | Caprin-1                                                                                                                                                                                                 | CAPRIN1                                                                                                               | 51.514 | 553770000       |
| Q9HB71                                                                            | Calcyclin-binding protein                                                                                                                                                                                | CACYBP                                                                                                                | 49.549 | 551350000       |
| P17174                                                                            | Aspartate aminotransferase, cytoplasmic                                                                                                                                                                  | GOT1                                                                                                                  | 58.497 | 548830000       |
| P52292                                                                            | Importin subunit alpha-1                                                                                                                                                                                 | KPNA2                                                                                                                 | 57.391 | 548150000       |
| P11166                                                                            | Solute carrier family 2, facilitated glucose transporter member 1                                                                                                                                        | SLC2A1                                                                                                                | 29.192 | 544140000       |
| Q13185                                                                            | Chromobox protein homolog 3                                                                                                                                                                              | CBX3                                                                                                                  | 30.078 | 542200000       |
| Q9Y5S9                                                                            | RNA-binding protein 8A                                                                                                                                                                                   | RBM8A                                                                                                                 | 28.929 | 539110000       |
| P62899                                                                            | 60S ribosomal protein L31                                                                                                                                                                                | RPL31                                                                                                                 | 26.035 | 535900000       |
| P69905                                                                            | Hemoglobin subunit alpha                                                                                                                                                                                 | HBA1                                                                                                                  | 28.205 | 525950000       |
| P62304                                                                            | Small nuclear ribonucleoprotein E                                                                                                                                                                        | SNRPE                                                                                                                 | 15.29  | 524860000       |
| P20700                                                                            | Lamin-B1                                                                                                                                                                                                 | LMNB1                                                                                                                 | 46.77  | 524190000       |
| Q9Y266                                                                            | Nuclear migration protein nudC                                                                                                                                                                           | NUDC                                                                                                                  | 28.352 | 517700000       |
| P29508;P48594                                                                     | Serpin B3;Serpin B4                                                                                                                                                                                      | SERPINB3;<br>SERPINB4                                                                                                 | 55.905 | 517400000       |
| Q9NRW1;P20340;Q14964                                                              | Ras-related protein Rab-6B;Ras-related protein Rab-6A;Ras-related protein Rab-39A                                                                                                                        | RAB6B;RAB6A;<br>RAB39A                                                                                                | 14.726 | 513920000       |
| Q7L2H7                                                                            | Eukaryotic translation initiation factor 3 subunit M                                                                                                                                                     | EIF3M                                                                                                                 | 50.307 | 512600000       |
| P18085                                                                            | ADP-ribosylation factor 4                                                                                                                                                                                | ARF4                                                                                                                  | 43.706 | 512260000       |
| P0DPI2;A0A0B4J2D5                                                                 | Glutamine amidotransferase-like class 1 domain-containing protein 3A, mitochondrial                                                                                                                      | GATD3A                                                                                                                | 54.573 | 509280000       |
| P14174                                                                            | Macrophage migration inhibitory factor                                                                                                                                                                   | MIF                                                                                                                   | 14.208 | 506410000       |
| P49321                                                                            | Nuclear autoantigenic sperm protein                                                                                                                                                                      | NASP                                                                                                                  | 45.68  | 505050000       |
| Q86VP6                                                                            | Cullin-associated NEDD8-dissociated protein 1                                                                                                                                                            | CAND1                                                                                                                 | 80.489 | 504640000       |
| Q15185                                                                            | Prostaglandin E synthase 3                                                                                                                                                                               | PTGES3                                                                                                                | 26.087 | 504250000       |
| Q8TAA9                                                                            | Vang-like protein 1                                                                                                                                                                                      | VANGL1                                                                                                                | 56.49  | 501430000       |
| P62979;P0CG47;P0CG48                                                              | Ubiquitin-40S ribosomal protein S27a;Ubiquitin; 40S ribosomal protein S27a;Polyubiquitin-B; Ubiquitin;Polyubiquitin-C;Ubiquitin                                                                          | RPS27A;UBB;<br>UBC                                                                                                    | 23.564 | 497390000       |
| P49588                                                                            | Alanine-tRNA ligase, cytoplasmic                                                                                                                                                                         | AARS                                                                                                                  | 75.019 | 495400000       |
| P09661                                                                            | U2 small nuclear ribonucleoprotein A                                                                                                                                                                     | SNRPA1                                                                                                                | 41.875 | 494310000       |
| P52209                                                                            | 6-phosphogluconate dehydrogenase, decarboxylating                                                                                                                                                        | PGD                                                                                                                   | 53.739 | 493990000       |
| P49736                                                                            | DNA replication licensing factor MCM2                                                                                                                                                                    | MCM2                                                                                                                  | 60.3   | 487030000       |
| P00747;Q15195;Q02325                                                              | Plasminogen;Plasmin heavy chain A;Activation peptide;Angiostatin;Plasmin heavy chain A, short form;Plasmin light chain B;Plasminogen-like protein A;Plasminogen-like protein B                           | PLG;PLGLA;<br>PLGLB1                                                                                                  | 12.553 | 485760000       |
| Q99879;Q99877;Q93079;<br>Q5QNW6;P62807;P58876;<br>O60814;Q99880;P57053;<br>Q96A08 | Histone H2B type 1-M;Histone H2B type 1-N; Histone H2B type 1-H;Histone H2B type 2-F; Histone H2B type 1-C/E/F/G/I; Histone H2B type 1-D;Histone H2B type 1-K; Histone H2B type 1-L;Histone H2B type F-S | HIST1H2BM;<br>HIST1H2BN;<br>HIST1H2BH;<br>HIST2H2BF;<br>HIST1H2BC;<br>HIST1H2BD;<br>HIST1H2BK;<br>HIST1H2BL;<br>H2BFS | 8.0085 | 477620000       |
| P46776                                                                            | 60S ribosomal protein L27a                                                                                                                                                                               | RPL27A                                                                                                                | 14.091 | 476090000       |
| P83731                                                                            | 60S ribosomal protein L24                                                                                                                                                                                | RPL24                                                                                                                 | 27.21  | 469850000       |
| Q92616                                                                            | Translational activator GCN1                                                                                                                                                                             | GCN1L1                                                                                                                | 121.35 | 469750000       |
| P06703                                                                            | Protein S100-A6                                                                                                                                                                                          | S100A6                                                                                                                | 20.274 | 466280000       |

Table SI. Continued.

| C, Proteins identified from both the control and treatment groups |                                                                                                                                               |                            |        |                 |
|-------------------------------------------------------------------|-----------------------------------------------------------------------------------------------------------------------------------------------|----------------------------|--------|-----------------|
| Protein ID                                                        | Protein names                                                                                                                                 | Gene names                 | Score  | LFQ intensity C |
| Q15008                                                            | 26S proteasome non-ATPase regulatory subunit 6                                                                                                | PSMD6                      | 51.689 | 464120000       |
| Q969Q0;P83881                                                     | 60S ribosomal protein L36a-like;60S ribosomal protein L36a                                                                                    | RPL36AL;<br>RPL36A         | 11.151 | 463030000       |
| P62266                                                            | 40S ribosomal protein S23                                                                                                                     | RPS23                      | 25.89  | 462560000       |
| P14314                                                            | Glucosidase 2 subunit beta                                                                                                                    | PRKCSH                     | 37.14  | 461820000       |
| Q15046                                                            | Lysine-tRNA ligase                                                                                                                            | KARS                       | 74.378 | 452450000       |
| P60900                                                            | Proteasome subunit alpha type-6                                                                                                               | PSMA6                      | 61.447 | 452240000       |
| P62191                                                            | 26S protease regulatory subunit 4                                                                                                             | PSMC1                      | 77.841 | 444680000       |
| Q12931                                                            | Heat shock protein 75 kDa, mitochondrial                                                                                                      | TRAP1                      | 48.592 | 443990000       |
| P81605                                                            | Dermcidin;Survival-promoting peptide;DCD-1                                                                                                    | DCD                        | 20.975 | 443140000       |
| P63173                                                            | 60S ribosomal protein L38                                                                                                                     | RPL38                      | 15.983 | 440580000       |
| P61586;P08134                                                     | Transforming protein RhoA;Rho-related GTP-binding protein RhoC                                                                                | RHOA;RHOC                  | 36.151 | 437590000       |
| Q15393                                                            | Splicing factor 3B subunit 3                                                                                                                  | SF3B3                      | 69.674 | 437230000       |
| P62491;Q15907                                                     | Ras-related protein Rab-11A;Ras-related protein Rab-11B                                                                                       | RAB11A;<br>RAB11B          | 36.206 | 437170000       |
| P26639;A2RTX5                                                     | Threonine-tRNA ligase, cytoplasmic                                                                                                            | TARS                       | 57.718 | 431300000       |
| P49721                                                            | Proteasome subunit beta type-2                                                                                                                | PSMB2                      | 54.737 | 430400000       |
| P61626                                                            | Lysozyme C                                                                                                                                    | LYZ                        | 33.985 | 429620000       |
| P25789                                                            | Proteasome subunit alpha type-4                                                                                                               | PSMA4                      | 27.636 | 428390000       |
| Q9Y3F4                                                            | Serine-threonine kinase receptor-associated protein                                                                                           | STRAP                      | 53.028 | 419570000       |
| P37108                                                            | Signal recognition particle 14 kDa protein                                                                                                    | SRP14                      | 21.176 | 419310000       |
| O75131;Q96FN4;Q8IYJ1;<br>Q96A23;O95741;Q86YQ8;<br>Q9HCH3;Q9UBL6   | Copine-3                                                                                                                                      | CPNE3                      | 49.143 | 418120000       |
| P14868                                                            | Aspartate-tRNA ligase, cytoplasmic                                                                                                            | DARS                       | 83.255 | 416920000       |
| P20618                                                            | Proteasome subunit beta type-1                                                                                                                | PSMB1                      | 34.486 | 416550000       |
| Q9NR30;Q9BQ39                                                     | Nucleolar RNA helicase 2                                                                                                                      | DDX21                      | 46.347 | 415840000       |
| Q13347                                                            | Eukaryotic translation initiation factor 3 subunit I                                                                                          | EIF3I                      | 44.026 | 411320000       |
| P19105;P24844;O14950                                              | Myosin regulatory light chain 12A;Myosin regulatory light polypeptide 9;Myosin regulatory light chain 12B                                     | MYL12A;<br>MYL9;<br>MYL12B | 34.733 | 411020000       |
| P31939                                                            | Bifunctional purine biosynthesis protein PURH; Phosphoribosylaminoimidazolecarboxamide formyltransferase;IMP cyclohydrolase                   | ATIC                       | 48.73  | 409350000       |
| O95373                                                            | Importin-7                                                                                                                                    | IPO7                       | 51.757 | 408120000       |
| O60264;P28370                                                     | SWI/SNF-related matrix-associated actin-dependent regulator of chromatin subfamily A member 5; Probable global transcription activator SNF2L1 | SMARCA5;<br>SMARCA1        | 32.303 | 391370000       |
| O00410                                                            | Importin-5                                                                                                                                    | IPO5                       | 107.46 | 389200000       |
| Q96AE4                                                            | Far upstream element-binding protein 1                                                                                                        | FUBP1                      | 47.65  | 387340000       |
| O75643                                                            | U5 small nuclear ribonucleoprotein 200 kDa helicase                                                                                           | SNRNP200                   | 76.932 | 386500000       |
| Q96FJ2;P63167                                                     | Dynein light chain 2, cytoplasmic;Dynein light chain 1, cytoplasmic                                                                           | DYNLL2;<br>DYNLL1          | 16.23  | 386480000       |
| P55060                                                            | Exportin-2                                                                                                                                    | CSE1L                      | 72.198 | 379740000       |
| Q5TZA2                                                            | Rootletin                                                                                                                                     | CROCC                      | 6.7439 | 378060000       |
| P20290;Q96K17                                                     | Transcription factor BTF3                                                                                                                     | BTF3                       | 26.445 | 376730000       |
| Q14019                                                            | Coactosin-like protein                                                                                                                        | COTL1                      | 27.48  | 376330000       |
| P36542                                                            | ATP synthase subunit gamma, mitochondrial                                                                                                     | ATP5C1                     | 30.723 | 375860000       |
| P12236                                                            | ADP/ATP translocase 3;ADP/ATP translocase 3, N-terminally processed                                                                           | SLC25A6                    | 12.954 | 370900000       |
| Q15019                                                            | Septin-2                                                                                                                                      | SEPT2                      | 40.174 | 367650000       |
| Q86VH2                                                            | Kinesin-like protein KIF27                                                                                                                    | KIF27                      | 6.5399 | 366650000       |



Table SI. Continued.

| C, Proteins identified from both the control and treatment groups |                                                                                                                                                                                               |                                                               |        |                 |
|-------------------------------------------------------------------|-----------------------------------------------------------------------------------------------------------------------------------------------------------------------------------------------|---------------------------------------------------------------|--------|-----------------|
| Protein ID                                                        | Protein names                                                                                                                                                                                 | Gene names                                                    | Score  | LFQ intensity C |
| Q13838;O00148                                                     | Spliceosome RNA helicase DDX39B;<br>ATP-dependent RNA helicase DDX39A                                                                                                                         | DDX39B;<br>DDX39A                                             | 59.783 | 366500000       |
| P21926                                                            | CD9 antigen                                                                                                                                                                                   | CD9                                                           | 7.5321 | 365450000       |
| P37837                                                            | Transaldolase                                                                                                                                                                                 | TALDO1                                                        | 40.4   | 362400000       |
| P47756                                                            | F-actin-capping protein subunit beta                                                                                                                                                          | CAPZB                                                         | 23.279 | 360500000       |
| O00303                                                            | Eukaryotic translation initiation factor 3 subunit F                                                                                                                                          | EIF3F                                                         | 37.554 | 358820000       |
| P53618                                                            | Coatomer subunit beta                                                                                                                                                                         | COPB1                                                         | 76.406 | 357040000       |
| Q9UL46                                                            | Proteasome activator complex subunit 2                                                                                                                                                        | PSME2                                                         | 44.14  | 352300000       |
| P16422                                                            | Epithelial cell adhesion molecule                                                                                                                                                             | EPCAM                                                         | 33.243 | 351190000       |
| P68400;Q8NEV1;P19784;<br>P12532;P17540                            | Casein kinase II subunit alpha;Casein kinase II<br>subunit alpha 3                                                                                                                            | CSNK2A1;<br>CSNK2A3                                           | 43.679 | 349120000       |
| P28070                                                            | Proteasome subunit beta type-4                                                                                                                                                                | PSMB4                                                         | 31.781 | 348180000       |
| O43143;O60231;Q14562                                              | Pre-mRNA-splicing factor ATP-dependent RNA<br>helicase DHX15                                                                                                                                  | DHX15                                                         | 60.335 | 347870000       |
| P05455                                                            | Lupus La protein                                                                                                                                                                              | SSB                                                           | 28.159 | 347860000       |
| P08237                                                            | ATP-dependent 6-phosphofructokinase, muscle type                                                                                                                                              | PFKM                                                          | 24.857 | 338990000       |
| P47897                                                            | Glutamine-tRNA ligase                                                                                                                                                                         | QARS                                                          | 54.742 | 338400000       |
| P12814                                                            | Alpha-actinin-1                                                                                                                                                                               | ACTN1                                                         | 55.015 | 336580000       |
| Q15029                                                            | 116 kDa U5 small nuclear ribonucleoprotein<br>component                                                                                                                                       | EFTUD2                                                        | 70.415 | 335590000       |
| P35998                                                            | 26S protease regulatory subunit 7                                                                                                                                                             | PSMC2                                                         | 50.312 | 335140000       |
| P01023;P20742                                                     | Alpha-2-macroglobulin                                                                                                                                                                         | A2M                                                           | 19.079 | 332490000       |
| P39748                                                            | Flap endonuclease 1                                                                                                                                                                           | FEN1                                                          | 39.747 | 332080000       |
| P47895                                                            | Aldehyde dehydrogenase family 1 member A3                                                                                                                                                     | ALDH1A3                                                       | 40.464 | 326720000       |
| Q9ULC5;Q9UKU0                                                     | Long-chain-fatty-acid-CoA ligase 5                                                                                                                                                            | ACSL5                                                         | 91.945 | 322820000       |
| Q12874                                                            | Splicing factor 3A subunit 3                                                                                                                                                                  | SF3A3                                                         | 43.633 | 321910000       |
| P51572                                                            | B-cell receptor-associated protein 31                                                                                                                                                         | BCAP31                                                        | 29.445 | 317810000       |
| P25205                                                            | DNA replication licensing factor MCM3                                                                                                                                                         | MCM3                                                          | 57.291 | 317310000       |
| P08195                                                            | 4F2 cell-surface antigen heavy chain                                                                                                                                                          | SLC3A2                                                        | 87.827 | 309780000       |
| P61221                                                            | ATP-binding cassette sub-family E member 1                                                                                                                                                    | ABCE1                                                         | 55.045 | 309280000       |
| Q13162                                                            | Peroxiredoxin-4                                                                                                                                                                               | PRDX4                                                         | 28.265 | 304180000       |
| Q96FQ6                                                            | Protein S100-A16                                                                                                                                                                              | S100A16                                                       | 22.665 | 304100000       |
| P54727;P54725                                                     | UV excision repair protein RAD23 homolog B                                                                                                                                                    | RAD23B                                                        | 35.737 | 302680000       |
| O75607                                                            | Nucleoplasmin-3                                                                                                                                                                               | NPM3                                                          | 40.949 | 302250000       |
| P62195;Q8NB90                                                     | 26S protease regulatory subunit 8                                                                                                                                                             | PSMC5                                                         | 67.103 | 300930000       |
| Q9NX58                                                            | Cell growth-regulating nucleolar protein                                                                                                                                                      | LYAR                                                          | 30.303 | 290220000       |
| P35326;P35325;P22532;<br>P22531;Q9BYE4;Q96RM1                     | Small proline-rich protein 2A;Small proline-rich<br>protein 2B;Small proline-rich protein 2D;Small<br>proline-rich protein 2E;Small proline-rich<br>protein 2G; Small proline-rich protein 2F | SPRR2A;<br>SPRR2B;<br>SPRR2D;<br>SPRR2E;<br>SPRR2G;<br>SPRR2F | 13.257 | 288720000       |
| P01008                                                            | Antithrombin-III                                                                                                                                                                              | SERPINC1                                                      | 22.825 | 288660000       |
| P06730                                                            | Eukaryotic translation initiation factor 4E                                                                                                                                                   | EIF4E                                                         | 13.813 | 287670000       |
| P68871;P02042                                                     | Hemoglobin subunit beta;LVV-hemorphin-7;<br>Spinorphin                                                                                                                                        | HBB                                                           | 21.504 | 287490000       |
| P25787                                                            | Proteasome subunit alpha type-2                                                                                                                                                               | PSMA2                                                         | 41.179 | 287320000       |
| Q13509                                                            | Tubulin beta-3 chain                                                                                                                                                                          | TUBB3                                                         | 27.566 | 282100000       |
| Q09666                                                            | Neuroblast differentiation-associated protein<br>AHNAK                                                                                                                                        | AHNAK                                                         | 35.052 | 279510000       |
| O15427                                                            | Monocarboxylate transporter 4                                                                                                                                                                 | SLC16A3                                                       | 20.005 | 279330000       |
| P50454                                                            | Serpin H1                                                                                                                                                                                     | SERPINH1                                                      | 52.439 | 277050000       |
| Q9NVA2;Q14141;<br>Q9P0V9; Q92599                                  | Septin-11                                                                                                                                                                                     | SEPT11                                                        | 18.921 | 277000000       |

Table SI. Continued.

| C, Proteins identified from both the control and treatment groups                                                                                                                                                                       |                                                                                                                                                                                                                                                                                                                                                                                                                                                                                                                                                                                                                                                                                                                                                                                                                                                                                                                                                                                                                                                                                                                                                                                                                                             |                       |        |                 |
|-----------------------------------------------------------------------------------------------------------------------------------------------------------------------------------------------------------------------------------------|---------------------------------------------------------------------------------------------------------------------------------------------------------------------------------------------------------------------------------------------------------------------------------------------------------------------------------------------------------------------------------------------------------------------------------------------------------------------------------------------------------------------------------------------------------------------------------------------------------------------------------------------------------------------------------------------------------------------------------------------------------------------------------------------------------------------------------------------------------------------------------------------------------------------------------------------------------------------------------------------------------------------------------------------------------------------------------------------------------------------------------------------------------------------------------------------------------------------------------------------|-----------------------|--------|-----------------|
| Protein ID                                                                                                                                                                                                                              | Protein names                                                                                                                                                                                                                                                                                                                                                                                                                                                                                                                                                                                                                                                                                                                                                                                                                                                                                                                                                                                                                                                                                                                                                                                                                               | Gene names            | Score  | LFQ intensity C |
| P04181                                                                                                                                                                                                                                  | Ornithine aminotransferase, mitochondrial;Ornithine aminotransferase, hepatic form;Ornithine aminotransferase, renal form                                                                                                                                                                                                                                                                                                                                                                                                                                                                                                                                                                                                                                                                                                                                                                                                                                                                                                                                                                                                                                                                                                                   | OAT                   | 45.459 | 274900000       |
| Q6P2Q9                                                                                                                                                                                                                                  | Pre-mRNA-processing-splicing factor 8                                                                                                                                                                                                                                                                                                                                                                                                                                                                                                                                                                                                                                                                                                                                                                                                                                                                                                                                                                                                                                                                                                                                                                                                       | PRPF8                 | 45.052 | 273820000       |
| P30685;P30491;P30488;<br>P30487;P30483;P30498;<br>P30495;P30490;P30484;<br>P30464;P18464;P10319;<br>P18465;P30455;P30447;<br>P30443;P13746;P05534;<br>P04439;P30501;Q95604;<br>P17693;P13747;Q31610;<br>P30486;P01893;Q31612;<br>P04222 | HLA class I histocompatibility antigen, B-35 alpha chain;HLA class I histocompatibility antigen, B-53 alpha chain;HLA class I histocompatibility antigen, B-50 alpha chain;HLA class I histocompatibility antigen, B-49 alpha chain;HLA class I histocompatibility antigen, B-45 alpha chain;HLA class I histocompatibility antigen, B-78 alpha chain;HLA class I histocompatibility antigen, B-56 alpha chain;HLA class I histocompatibility antigen, B-52 alpha chain;HLA class I histocompatibility antigen, B-46 alpha chain;HLA class I histocompatibility antigen, B-15 alpha chain;HLA class I histocompatibility antigen, B-51 alpha chain;HLA class I histocompatibility antigen, B-58 alpha chain;HLA class I histocompatibility antigen, B-57 alpha chain;HLA class I histocompatibility antigen, A-36 alpha chain;HLA class I histocompatibility antigen, A-23 alpha chain;HLA class I histocompatibility antigen, A-1 alpha chain;HLA class I histocompatibility antigen, A-11 alpha chain;HLA class I histocompatibility antigen, A-24 alpha chain;HLA class I histocompatibility antigen, A-3 alpha chain;HLA class I histocompatibility antigen, Cw-2 alpha chain;HLA class I histocompatibility antigen, Cw-17 alpha chain | HLA-B;HLA-A;<br>HLA-C | 27.316 | 273630000       |
| Q8WX93;Q86TC9                                                                                                                                                                                                                           | Palladin                                                                                                                                                                                                                                                                                                                                                                                                                                                                                                                                                                                                                                                                                                                                                                                                                                                                                                                                                                                                                                                                                                                                                                                                                                    | PALLD                 | 39.575 | 272590000       |
| P35606                                                                                                                                                                                                                                  | Coatomer subunit beta                                                                                                                                                                                                                                                                                                                                                                                                                                                                                                                                                                                                                                                                                                                                                                                                                                                                                                                                                                                                                                                                                                                                                                                                                       | COPB2                 | 53.661 | 271820000       |
| P08133                                                                                                                                                                                                                                  | Annexin A6                                                                                                                                                                                                                                                                                                                                                                                                                                                                                                                                                                                                                                                                                                                                                                                                                                                                                                                                                                                                                                                                                                                                                                                                                                  | ANXA6                 | 48.963 | 265000000       |
| P49720                                                                                                                                                                                                                                  | Proteasome subunit beta type-3                                                                                                                                                                                                                                                                                                                                                                                                                                                                                                                                                                                                                                                                                                                                                                                                                                                                                                                                                                                                                                                                                                                                                                                                              | PSMB3                 | 30.822 | 264620000       |
| P35221;Q9UI47                                                                                                                                                                                                                           | Catenin alpha-1                                                                                                                                                                                                                                                                                                                                                                                                                                                                                                                                                                                                                                                                                                                                                                                                                                                                                                                                                                                                                                                                                                                                                                                                                             | CTNNA1                | 92.335 | 263590000       |
| Q01082                                                                                                                                                                                                                                  | Spectrin beta chain, non-erythrocytic 1                                                                                                                                                                                                                                                                                                                                                                                                                                                                                                                                                                                                                                                                                                                                                                                                                                                                                                                                                                                                                                                                                                                                                                                                     | SPTBN1                | 42.883 | 262330000       |
| P51571                                                                                                                                                                                                                                  | Translocon-associated protein subunit delta                                                                                                                                                                                                                                                                                                                                                                                                                                                                                                                                                                                                                                                                                                                                                                                                                                                                                                                                                                                                                                                                                                                                                                                                 | SSR4                  | 22.085 | 261920000       |
| P33991                                                                                                                                                                                                                                  | DNA replication licensing factor MCM4                                                                                                                                                                                                                                                                                                                                                                                                                                                                                                                                                                                                                                                                                                                                                                                                                                                                                                                                                                                                                                                                                                                                                                                                       | MCM4                  | 54.497 | 260260000       |
| Q9NP55                                                                                                                                                                                                                                  | BPI fold-containing family A member 1                                                                                                                                                                                                                                                                                                                                                                                                                                                                                                                                                                                                                                                                                                                                                                                                                                                                                                                                                                                                                                                                                                                                                                                                       | BPIFA1                | 36.585 | 258560000       |
| P60953                                                                                                                                                                                                                                  | Cell division control protein 42 homolog                                                                                                                                                                                                                                                                                                                                                                                                                                                                                                                                                                                                                                                                                                                                                                                                                                                                                                                                                                                                                                                                                                                                                                                                    | CDC42                 | 36.162 | 257900000       |
| Q15691                                                                                                                                                                                                                                  | Microtubule-associated protein RP/EB family member 1                                                                                                                                                                                                                                                                                                                                                                                                                                                                                                                                                                                                                                                                                                                                                                                                                                                                                                                                                                                                                                                                                                                                                                                        | MAPRE1                | 15.962 | 257680000       |
| Q99460                                                                                                                                                                                                                                  | 26S proteasome non-ATPase regulatory subunit 1                                                                                                                                                                                                                                                                                                                                                                                                                                                                                                                                                                                                                                                                                                                                                                                                                                                                                                                                                                                                                                                                                                                                                                                              | PSMD1                 | 43.841 | 255820000       |
| P35321;P22528                                                                                                                                                                                                                           | Cornifin-A;Cornifin-B                                                                                                                                                                                                                                                                                                                                                                                                                                                                                                                                                                                                                                                                                                                                                                                                                                                                                                                                                                                                                                                                                                                                                                                                                       | SPRR1A;<br>SPRR1B     | 10.69  | 250040000       |
| P07864                                                                                                                                                                                                                                  | L-lactate dehydrogenase C chain                                                                                                                                                                                                                                                                                                                                                                                                                                                                                                                                                                                                                                                                                                                                                                                                                                                                                                                                                                                                                                                                                                                                                                                                             | LDHC                  | 7.6754 | 245950000       |
| P41250                                                                                                                                                                                                                                  | Glycine-tRNA ligase                                                                                                                                                                                                                                                                                                                                                                                                                                                                                                                                                                                                                                                                                                                                                                                                                                                                                                                                                                                                                                                                                                                                                                                                                         | GARS                  | 57.252 | 245700000       |
| P00403                                                                                                                                                                                                                                  | Cytochrome c oxidase subunit 2                                                                                                                                                                                                                                                                                                                                                                                                                                                                                                                                                                                                                                                                                                                                                                                                                                                                                                                                                                                                                                                                                                                                                                                                              | MT-CO2                | 27.822 | 244390000       |
| Q9UNM6                                                                                                                                                                                                                                  | 26S proteasome non-ATPase regulatory subunit 13                                                                                                                                                                                                                                                                                                                                                                                                                                                                                                                                                                                                                                                                                                                                                                                                                                                                                                                                                                                                                                                                                                                                                                                             | PSMD13                | 34.133 | 243390000       |
| P60981                                                                                                                                                                                                                                  | Dextrin                                                                                                                                                                                                                                                                                                                                                                                                                                                                                                                                                                                                                                                                                                                                                                                                                                                                                                                                                                                                                                                                                                                                                                                                                                     | DSTN                  | 38.531 | 241800000       |
| O00232                                                                                                                                                                                                                                  | 26S proteasome non-ATPase regulatory subunit 12                                                                                                                                                                                                                                                                                                                                                                                                                                                                                                                                                                                                                                                                                                                                                                                                                                                                                                                                                                                                                                                                                                                                                                                             | PSMD12                | 50.555 | 236150000       |
| P15559                                                                                                                                                                                                                                  | NAD(P)H dehydrogenase [quinone] 1                                                                                                                                                                                                                                                                                                                                                                                                                                                                                                                                                                                                                                                                                                                                                                                                                                                                                                                                                                                                                                                                                                                                                                                                           | NQO1                  | 41.133 | 236010000       |
| Q9P0L0                                                                                                                                                                                                                                  | Vesicle-associated membrane protein-associated protein A                                                                                                                                                                                                                                                                                                                                                                                                                                                                                                                                                                                                                                                                                                                                                                                                                                                                                                                                                                                                                                                                                                                                                                                    | VAPA                  | 21.943 | 233010000       |

Table SI. Continued.

| C, Proteins identified from both the control and treatment groups |                                                                                                          |            |        |                 |
|-------------------------------------------------------------------|----------------------------------------------------------------------------------------------------------|------------|--------|-----------------|
| Protein ID                                                        | Protein names                                                                                            | Gene names | Score  | LFQ intensity C |
| Q9Y4Z0                                                            | U6 snRNA-associated Sm-like protein LSm4                                                                 | LSM4       | 20.657 | 229220000       |
| Q04917                                                            | 14-3-3 protein eta                                                                                       | YWHAH      | 20.133 | 226610000       |
| Q15369                                                            | Transcription elongation factor B polypeptide 1                                                          | TCEB1      | 12.414 | 221310000       |
| Q13867                                                            | Bleomycin hydrolase                                                                                      | BLMH       | 43.743 | 220550000       |
| P39656                                                            | Dolichyl-diphosphooligosaccharide-protein glycosyltransferase 48 kDa subunit                             | DDOST      | 20.007 | 219940000       |
| Q99714                                                            | 3-hydroxyacyl-CoA dehydrogenase type-2                                                                   | HSD17B10   | 39.326 | 218790000       |
| Q9BTT0                                                            | Acidic leucine-rich nuclear phosphoprotein 32 family member E                                            | ANP32E     | 38     | 218630000       |
| P52907;P47755                                                     | F-actin-capping protein subunit alpha-1                                                                  | CAPZA1     | 28.713 | 217360000       |
| Q06323                                                            | Proteasome activator complex subunit 1                                                                   | PSME1      | 30.822 | 214520000       |
| O43776                                                            | Asparagine-tRNA ligase, cytoplasmic                                                                      | NARS       | 31.851 | 207180000       |
| P61019                                                            | Ras-related protein Rab-2A                                                                               | RAB2A      | 9.92   | 205840000       |
| P00491                                                            | Purine nucleoside phosphorylase                                                                          | PNP        | 48.329 | 205600000       |
| Q9Y617                                                            | Phosphoserine aminotransferase                                                                           | PSAT1      | 45.699 | 205350000       |
| P08621                                                            | U1 small nuclear ribonucleoprotein 70 kDa                                                                | SNRNP70    | 32.593 | 205350000       |
| Q92688                                                            | Acidic leucine-rich nuclear phosphoprotein 32 family member B                                            | ANP32B     | 19.195 | 204830000       |
| O00487                                                            | 26S proteasome non-ATPase regulatory subunit 14                                                          | PSMD14     | 6.3417 | 204320000       |
| O95433                                                            | Activator of 90 kDa heat shock protein ATPase homolog 1                                                  | AHSA1      | 35.766 | 201120000       |
| Q9UBQ5                                                            | Eukaryotic translation initiation factor 3 subunit K                                                     | EIF3K      | 28.653 | 198720000       |
| P08579                                                            | U2 small nuclear ribonucleoprotein B                                                                     | SNRPB2     | 19.267 | 198120000       |
| P10515                                                            | Dihydrolipoyllysine-residue acetyltransferase component of pyruvate dehydrogenase complex, mitochondrial | DLAT       | 31.376 | 196660000       |
| O15371                                                            | Eukaryotic translation initiation factor 3 subunit D                                                     | EIF3D      | 36.751 | 195290000       |
| P06396                                                            | Gelsolin                                                                                                 | GSN        | 20.079 | 192440000       |
| P00846                                                            | ATP synthase subunit a                                                                                   | MT-ATP6    | 12.374 | 189780000       |
| P63010                                                            | AP-2 complex subunit beta                                                                                | AP2B1      | 32.415 | 187800000       |
| P01833                                                            | Polymeric immunoglobulin receptor;Secretory component                                                    | PIGR       | 28.873 | 187320000       |
| Q9BQE3                                                            | Tubulin alpha-1C chain                                                                                   | TUBA1C     | 24.299 | 184400000       |
| Q14258                                                            | E3 ubiquitin/ISG15 ligase TRIM25                                                                         | TRIM25     | 24.868 | 184280000       |
| O60841                                                            | Eukaryotic translation initiation factor 5B                                                              | EIF5B      | 32.745 | 181040000       |
| Q7L1Q6                                                            | Basic leucine zipper and W2 domain-containing protein 1                                                  | BZW1       | 53.949 | 176150000       |
| P27695                                                            | DNA-(apurinic or apyrimidinic site) lyase; DNA-(apurinic or apyrimidinic site) lyase, mitochondrial      | APEX1      | 23.862 | 175610000       |
| P51148;P61020;P20339                                              | Ras-related protein Rab-5C                                                                               | RAB5C      | 35.065 | 171480000       |
| Q92520                                                            | Protein FAM3C                                                                                            | FAM3C      | 6.9064 | 171310000       |
| P31949                                                            | Protein S100-A11;Protein S100-A11, N-terminally processed                                                | S100A11    | 27.692 | 167900000       |
| P20930                                                            | Filaggrin                                                                                                | FLG        | 19.304 | 167530000       |
| P61160                                                            | Actin-related protein 2                                                                                  | ACTR2      | 32.771 | 166380000       |
| Q8NBS9                                                            | Thioredoxin domain-containing protein 5                                                                  | TXNDC5     | 21.262 | 166270000       |
| P06732                                                            | Creatine kinase M-type;Creatine kinase M-type, N-terminally processed                                    | CKM        | 11.408 | 166140000       |
| O14579                                                            | Coatamer subunit epsilon                                                                                 | COPE       | 30.443 | 164500000       |
| P04632;Q96L46                                                     | Calpain small subunit 1                                                                                  | CAPNS1     | 35.297 | 163870000       |
| Q15758                                                            | Neutral amino acid transporter B(0)                                                                      | SLC1A5     | 20.064 | 163380000       |
| P45974                                                            | Ubiquitin carboxyl-terminal hydrolase 5                                                                  | USP5       | 29.785 | 161200000       |

Table SI. Continued.

| C, Proteins identified from both the control and treatment groups |                                                                                                                                                |                   |        |                 |
|-------------------------------------------------------------------|------------------------------------------------------------------------------------------------------------------------------------------------|-------------------|--------|-----------------|
| Protein ID                                                        | Protein names                                                                                                                                  | Gene names        | Score  | LFQ intensity C |
| Q16881;Q9NNW7                                                     | Thioredoxin reductase 1, cytoplasmic                                                                                                           | TXNRD1            | 25.809 | 158340000       |
| P36957                                                            | Dihydrolipoyllysine-residue succinyltransferase component of 2-oxoglutarate dehydrogenase complex, mitochondrial                               | DLST              | 29.899 | 156760000       |
| P55010                                                            | Eukaryotic translation initiation factor 5                                                                                                     | EIF5              | 17.27  | 155200000       |
| Q16186                                                            | Proteasomal ubiquitin receptor ADRM1                                                                                                           | ADRM1             | 23.548 | 154360000       |
| P05556                                                            | Integrin beta-1                                                                                                                                | ITGB1             | 32.39  | 150660000       |
| P11766                                                            | Alcohol dehydrogenase class-3                                                                                                                  | ADH5              | 5.9509 | 150530000       |
| P62829                                                            | 60S ribosomal protein L23                                                                                                                      | RPL23             | 33.189 | 148540000       |
| O15479                                                            | Melanoma-associated antigen B2                                                                                                                 | MAGEB2            | 12.316 | 146970000       |
| P17655                                                            | Calpain-2 catalytic subunit                                                                                                                    | CAPN2             | 27.727 | 146680000       |
| Q9Y5A9;Q7Z739                                                     | YTH domain-containing family protein 2;<br>YTH domain-containing family protein 3                                                              | YTHDF2;<br>YTHDF3 | 13.516 | 145120000       |
| P61803                                                            | Dolichyl-diphosphooligosaccharide-protein glycosyltransferase subunit DAD1                                                                     | DAD1              | 14.811 | 144860000       |
| P59998                                                            | Actin-related protein 2/3 complex subunit 4                                                                                                    | ARPC4             | 19.543 | 144770000       |
| P33176;O60282;Q12840                                              | Kinesin-1 heavy chain                                                                                                                          | KIF5B             | 40.204 | 144650000       |
| Q16576                                                            | Histone-binding protein RBBP7                                                                                                                  | RBBP7             | 17.541 | 141160000       |
| P54577                                                            | Tyrosine-tRNA ligase, cytoplasmic;Tyrosine-tRNA ligase, cytoplasmic, N-terminally processed                                                    | YARS              | 35.61  | 141140000       |
| P67775;P62714                                                     | Serine/threonine-protein phosphatase 2A catalytic subunit alpha isoform;Serine/threonine-protein phosphatase 2A catalytic subunit beta isoform | PPP2CA;<br>PPP2CB | 13.628 | 140700000       |
| P26196                                                            | Probable ATP-dependent RNA helicase DDX6                                                                                                       | DDX6              | 33.173 | 138000000       |
| Q9Y383;Q9NQ29                                                     | Putative RNA-binding protein Luc7-like 2                                                                                                       | LUC7L2            | 26.023 | 137830000       |
| Q9UHB9                                                            | Signal recognition particle subunit SRP68                                                                                                      | SRP68             | 16.049 | 136360000       |
| Q08209;P16298;P48454                                              | Serine/threonine-protein phosphatase 2B catalytic subunit alpha isoform;Serine/threonine-protein phosphatase 2B catalytic subunit beta isoform | PPP3CA;<br>PPP3CB | 24.892 | 135460000       |
| P82933                                                            | 28S ribosomal protein S9, mitochondrial                                                                                                        | MRPS9             | 13.642 | 132240000       |
| P28072                                                            | Proteasome subunit beta type-6                                                                                                                 | PSMB6             | 13.799 | 129500000       |
| Q9Y5M8                                                            | Signal recognition particle receptor subunit beta                                                                                              | SRPRB             | 15.874 | 128720000       |
| O60884                                                            | DnaJ homolog subfamily A member 2                                                                                                              | DNAJA2            | 31.054 | 126820000       |
| P56192                                                            | Methionine-tRNA ligase, cytoplasmic                                                                                                            | MARS              | 32.391 | 126390000       |
| P48556                                                            | 26S proteasome non-ATPase regulatory subunit 8                                                                                                 | PSMD8             | 24.521 | 124740000       |
| P50995                                                            | Annexin A11                                                                                                                                    | ANXA11            | 15.302 | 124540000       |
| Q9HDC9                                                            | Adipocyte plasma membrane-associated protein                                                                                                   | APMAP             | 15.314 | 123550000       |
| P17980                                                            | 26S protease regulatory subunit 6A                                                                                                             | PSMC3             | 19.66  | 123420000       |
| O75844                                                            | CAAX prenyl protease 1 homolog                                                                                                                 | ZMPSTE24          | 20.407 | 123200000       |
| Q9NZB2                                                            | Constitutive coactivator of PPAR-gamma-like protein 1                                                                                          | FAM120A           | 22.364 | 121020000       |
| Q7Z4W1                                                            | L-xylulose reductase                                                                                                                           | DCXR              | 14.604 | 119760000       |
| P13804                                                            | Electron transfer flavoprotein subunit alpha, mitochondrial                                                                                    | ETFA              | 24.276 | 118090000       |
| Q96G23                                                            | Ceramide synthase 2                                                                                                                            | CERS2             | 6.2357 | 117750000       |
| Q9P2J5                                                            | Leucine-tRNA ligase, cytoplasmic                                                                                                               | LARS              | 23.165 | 115320000       |
| P27708                                                            | CAD protein;Glutamine-dependent carbamoyl-phosphate synthase;Aspartate carbamoyltransferase;Dihydroorotase                                     | CAD               | 33.411 | 114600000       |
| Q96P63                                                            | Serpin B12                                                                                                                                     | SERPINB12         | 12.23  | 113220000       |
| O43708                                                            | Maleylacetoacetate isomerase                                                                                                                   | GSTZ1             | 15.504 | 110950000       |
| Q9H9B4                                                            | Sideroflexin-1                                                                                                                                 | SFXN1             | 31.74  | 110910000       |
| P32322                                                            | Pyroline-5-carboxylate reductase 1, mitochondrial                                                                                              | PYCR1             | 20.162 | 109700000       |

Table SI. Continued.

| C, Proteins identified from both the control and treatment groups |                                                                                                                       |                   |        |                 |
|-------------------------------------------------------------------|-----------------------------------------------------------------------------------------------------------------------|-------------------|--------|-----------------|
| Protein ID                                                        | Protein names                                                                                                         | Gene names        | Score  | LFQ intensity C |
| P68402                                                            | Platelet-activating factor acetylhydrolase IB subunit beta                                                            | PAFAH1B2          | 22.713 | 105650000       |
| Q96QK1                                                            | Vacuolar protein sorting-associated protein 35                                                                        | VPS35             | 23.493 | 105560000       |
| Q15370                                                            | Transcription elongation factor B polypeptide 2                                                                       | TCEB2             | 19.428 | 105120000       |
| O15260                                                            | Surfeit locus protein 4                                                                                               | SURF4             | 21.056 | 104890000       |
| O76021                                                            | Ribosomal L1 domain-containing protein 1                                                                              | RSL1D1            | 23.045 | 103400000       |
| P09622                                                            | Dihydrolipoyl dehydrogenase, mitochondrial                                                                            | DLD               | 24.418 | 102820000       |
| Q7L576;Q96F07                                                     | Cytoplasmic FMR1-interacting protein 1;<br>Cytoplasmic FMR1-interacting protein 2                                     | CYFIP1;<br>CYFIP2 | 12.726 | 102090000       |
| Q9Y285                                                            | Phenylalanine-tRNA ligase alpha subunit                                                                               | FARSA             | 34.987 | 101740000       |
| Q14204                                                            | Cytoplasmic dynein 1 heavy chain 1                                                                                    | DYNC1H1           | 36.975 | 99482000        |
| P07951                                                            | Tropomyosin beta chain                                                                                                | TPM2              | 55.711 | 98347000        |
| Q9NTK5                                                            | Obg-like ATPase 1                                                                                                     | OLA1              | 20.638 | 97686000        |
| Q9Y678;Q9UBF2                                                     | Coatomer subunit gamma-1                                                                                              | COPG1             | 32.168 | 97538000        |
| O76094                                                            | Signal recognition particle subunit SRP72                                                                             | SRP72             | 51.882 | 96993000        |
| P28331                                                            | NADH-ubiquinone oxidoreductase 75 kDa subunit, mitochondrial                                                          | NDUFS1            | 17.626 | 96582000        |
| Q96CS3                                                            | FAS-associated factor 2                                                                                               | FAF2              | 18.015 | 95942000        |
| Q86UE4                                                            | Protein LYRIC                                                                                                         | MTDH              | 22.649 | 95625000        |
| Q9GZT3                                                            | SRA stem-loop-interacting RNA-binding protein, mitochondrial                                                          | SLIRP             | 14.616 | 94979000        |
| P47813;O14602                                                     | Eukaryotic translation initiation factor 1A, X-chromosomal;Eukaryotic translation initiation factor 1A, Y-chromosomal | EIF1AX;<br>EIF1AY | 5.9554 | 94625000        |
| Q15836;P63027                                                     | Vesicle-associated membrane protein 3;<br>Vesicle-associated membrane protein 2                                       | VAMP3;<br>VAMP2   | 7.6959 | 94570000        |
| P19367                                                            | Hexokinase-1                                                                                                          | HK1               | 15.07  | 93167000        |
| P49748                                                            | Very long-chain specific acyl-CoA dehydrogenase, mitochondrial                                                        | ACADVL            | 32.29  | 91446000        |
| Q00765                                                            | Receptor expression-enhancing protein 5                                                                               | REEP5             | 12.675 | 88644000        |
| P68366                                                            | Tubulin alpha-4A chain                                                                                                | TUBA4A            | 7.9817 | 88137000        |
| P31040                                                            | Succinate dehydrogenase [ubiquinone] flavoprotein subunit, mitochondrial                                              | SDHA              | 16.619 | 87724000        |
| P63261                                                            | Actin, cytoplasmic 2;Actin, cytoplasmic 2, N-terminally processed                                                     | ACTG1             | 9.0297 | 85067000        |
| Q9UDY4;P25685                                                     | DnaJ homolog subfamily B member 4;DnaJ homolog subfamily B member 1                                                   | DNAJB4;<br>DNAJB1 | 6.3198 | 85043000        |
| Q9NR31;Q9Y6B6                                                     | GTP-binding protein SAR1a;GTP-binding protein SAR1b                                                                   | SAR1A;<br>SAR1B   | 19.166 | 84921000        |
| Q13813                                                            | Spectrin alpha chain, non-erythrocytic 1                                                                              | SPTAN1            | 78.611 | 84593000        |
| P49755                                                            | Transmembrane emp24 domain-containing protein 10                                                                      | TMED10            | 13.986 | 83243000        |
| P04350                                                            | Tubulin beta-4A chain                                                                                                 | TUBB4A            | 20.325 | 83056000        |
| P11177                                                            | Pyruvate dehydrogenase E1 component subunit beta, mitochondrial                                                       | PDHB              | 7.8596 | 82436000        |
| P17812                                                            | CTP synthase 1                                                                                                        | CTPS1             | 17.329 | 81859000        |
| P43686                                                            | 26S protease regulatory subunit 6B                                                                                    | PSMC4             | 35.566 | 81438000        |
| Q9BYT1                                                            | Solute carrier family 17 member 9                                                                                     | SLC17A9           | 5.8256 | 80110000        |
| P30740                                                            | Leukocyte elastase inhibitor                                                                                          | SERPINB1          | 17.516 | 78822000        |
| Q59GN2;P62891                                                     | Putative 60S ribosomal protein L39-like 5;<br>60S ribosomal protein L39                                               | RPL39P5;<br>RPL39 | 7.4488 | 78256000        |
| Q9NPH2                                                            | Inositol-3-phosphate synthase 1                                                                                       | ISYNA1            | 24.627 | 78025000        |
| Q99536                                                            | Synaptic vesicle membrane protein VAT-1 homolog                                                                       | VAT1              | 12.315 | 76217000        |



Table SI. Continued.

| C, Proteins identified from both the control and treatment groups |                                                                                                                                                |                        |        |                 |
|-------------------------------------------------------------------|------------------------------------------------------------------------------------------------------------------------------------------------|------------------------|--------|-----------------|
| Protein ID                                                        | Protein names                                                                                                                                  | Gene names             | Score  | LFQ intensity C |
| P40939                                                            | Trifunctional enzyme subunit alpha, mitochondrial; Long-chain enoyl-CoA hydratase;Long chain 3-hydroxyacyl-CoA dehydrogenase                   | HADHA                  | 23.902 | 74408000        |
| P08243                                                            | Asparagine synthetase [glutamine-hydrolyzing]                                                                                                  | ASNS                   | 41.145 | 73525000        |
| P13489                                                            | Ribonuclease inhibitor                                                                                                                         | RNH1                   | 13.921 | 68627000        |
| Q9NV17;Q5T2N8;Q5T9A4                                              | ATPase family AAA domain-containing protein 3A; ATPase family AAA domain-containing protein 3C; ATPase family AAA domain-containing protein 3B | ATAD3A; ATAD3C; ATAD3B | 21.777 | 67489000        |
| P43034                                                            | Platelet-activating factor acetylhydrolase IB subunit alpha                                                                                    | PAFAH1B1               | 9.6074 | 67200000        |
| A0A0C4DH73; A0A0C4DH72;P04432; P01611;P01597                      | Ig kappa chain V-I region Daudi;Ig kappa chain V-I region Wes;Ig kappa chain V-I region DEE                                                    | IGKV1-12; IGKV1-6      | 7.3278 | 65933000        |
| P53621                                                            | Coatomer subunit alpha;Xenin;Proxenin                                                                                                          | COPA                   | 49.66  | 64818000        |
| P61158                                                            | Actin-related protein 3                                                                                                                        | ACTR3                  | 20.562 | 64407000        |
| O15355                                                            | Protein phosphatase 1G                                                                                                                         | PPM1G                  | 8.4042 | 63665000        |
| Q13011                                                            | Delta(3,5)-Delta(2,4)-dienoyl-CoA isomerase, mitochondrial                                                                                     | ECH1                   | 19.48  | 63022000        |
| Q15437;Q15436                                                     | Protein transport protein Sec23B;Protein transport protein Sec23A                                                                              | SEC23B; SEC23A         | 15.91  | 61745000        |
| Q8N163                                                            | Cell cycle and apoptosis regulator protein 2                                                                                                   | CCAR2                  | 15.379 | 61514000        |
| P61026                                                            | Ras-related protein Rab-10                                                                                                                     | RAB10                  | 9.007  | 60847000        |
| P61758                                                            | Prefoldin subunit 3                                                                                                                            | VBP1                   | 38.932 | 58684000        |
| P19525                                                            | Interferon-induced, double-stranded RNA-activated protein kinase                                                                               | EIF2AK2                | 11.8   | 58274000        |
| O60716                                                            | Catenin delta-1                                                                                                                                | CTNND1                 | 25.211 | 53321000        |
| Q92552                                                            | 28S ribosomal protein S27, mitochondrial                                                                                                       | MRPS27                 | 13.565 | 52093000        |
| P26006                                                            | Integrin alpha-3;Integrin alpha-3 heavy chain; Integrin alpha-3 light chain                                                                    | ITGA3                  | 13.675 | 49971000        |
| P23381                                                            | Tryptophan-tRNA ligase, cytoplasmic;T1-TrpRS; T2-TrpRS                                                                                         | WARS                   | 7.8943 | 49351000        |
| P23921                                                            | Ribonucleoside-diphosphate reductase large subunit                                                                                             | RRM1                   | 13.277 | 48783000        |
| P28838                                                            | Cytosol aminopeptidase                                                                                                                         | LAP3                   | 8.2415 | 46972000        |
| P35579                                                            | Myosin-9                                                                                                                                       | MYH9                   | 202.15 | 46248000        |
| P61011                                                            | Signal recognition particle 54 kDa protein                                                                                                     | SRP54                  | 18.232 | 45354000        |
| Q96HR9                                                            | Receptor expression-enhancing protein 6                                                                                                        | REEP6                  | 9.0442 | 43144000        |
| P54707;P20648; REV__Q15772                                        | Potassium-transporting ATPase alpha chain 2; Potassium-transporting ATPase alpha chain 1                                                       | ATP12A;ATP4A           | 5.8064 | 40291000        |
| Q9BQG0                                                            | Myb-binding protein 1A                                                                                                                         | MYBBP1A                | 6.1191 | 38449000        |
| O94952                                                            | F-box only protein 21                                                                                                                          | FBXO21                 | 8.4275 | 34156000        |
| P43246                                                            | DNA mismatch repair protein Msh2                                                                                                               | MSH2                   | 14.634 | 32804000        |
| Q9Y277                                                            | Voltage-dependent anion-selective channel protein 3                                                                                            | VDAC3                  | 6.7105 | 31239000        |
| P06132                                                            | Uroporphyrinogen decarboxylase                                                                                                                 | UROD                   | 10.884 | 30058000        |
| Q5VYK3                                                            | Proteasome-associated protein ECM29 homolog                                                                                                    | ECM29                  | 11.928 | 28214000        |
| Q15388                                                            | Mitochondrial import receptor subunit TOM20 homolog                                                                                            | TOMM20                 | 6.9442 | 27524000        |
| O94826                                                            | Mitochondrial import receptor subunit TOM70                                                                                                    | TOMM70A                | 13.125 | 27506000        |
| P35250                                                            | Replication factor C subunit 2                                                                                                                 | RFC2                   | 6.0673 | 25338000        |
| Q9BYD6                                                            | 39S ribosomal protein L1, mitochondrial                                                                                                        | MRPL1                  | 5.8431 | 24542000        |
| P52701                                                            | DNA mismatch repair protein Msh6                                                                                                               | MSH6                   | 8.0163 | 24059000        |
| O43252                                                            | Bifunctional 3-phosphoadenosine 5-phosphosulfate synthase 1;Sulfate adenylyltransferase; Adenylyl-sulfate kinase                               | PAPSS1                 | 11.093 | 24056000        |
| Q9NRP0                                                            | Oligosaccharyltransferase complex subunit OSTC                                                                                                 | OSTC                   | 7.3947 | 23275000        |

Table SI. Continued.

C, Proteins identified from both the control and treatment groups

| Protein ID | Protein names                                               | Gene names | Score  | LFQ intensity C |
|------------|-------------------------------------------------------------|------------|--------|-----------------|
| Q5T4S7     | E3 ubiquitin-protein ligase UBR4                            | UBR4       | 7.7202 | 21577000        |
| Q9NU22     | Midasin                                                     | MDN1       | 7.2399 | 20992000        |
| Q14919     | Dr1-associated corepressor                                  | DRAP1      | 5.9565 | 19964000        |
| Q5H9R7     | Serine/threonine-protein phosphatase 6 regulatory subunit 3 | PPP6R3     | 7.3097 | 19031000        |
| O60610     | Protein diaphanous homolog 1                                | DIAPH1     | 8.2534 | 18838000        |
| Q8TEX9     | Importin-4                                                  | IPO4       | 7.6681 | 18108000        |
| Q9NYT0     | Pleckstrin-2                                                | PLEK2      | 9.8331 | 17323000        |
| Q15813     | Tubulin-specific chaperone E                                | TBCE       | 8.1297 | 15091000        |
| O14976     | Cyclin-G-associated kinase                                  | GAK        | 8.0387 | 11994000        |

C, control; T, treatment.
